# Supplementary material
Source: publisher figshare collection journal article supplement (https://acs.figshare.com/ndownloader/files/23538202)
Supplement: Supplementary file 1 [file 23538202]

## Supporting Information

# Electrochemical Strategy for Hydrazine Synthesis: Development and Overpotential Analysis of Methods for Oxidative N–N Coupling of an Ammonia Surrogate

Fei Wang, James B. Gerken, Desiree M. Bates, Yeon Jung Kim, Shannon S. Stahl\*

Department of Chemistry, University of Wisconsin-Madison, 1101 University Avenue

Madison, WI, 53706, United States

stahl@chem.wisc.edu

### Table of Contents:

---

|     |                                                                              |            |
|-----|------------------------------------------------------------------------------|------------|
| 1.  | <i>General Experimental Considerations.....</i>                              | <i>S2</i>  |
| 2.  | <i>General Procedures for Bulk Electrolysis (BE).....</i>                    | <i>S3</i>  |
| 3.  | <i>Optimization of Reaction Conditions.....</i>                              | <i>S9</i>  |
| 4.  | <i>Cyclic Voltammetry Studies.....</i>                                       | <i>S12</i> |
| 5.  | <i>Pourbaix Diagram Data Collection and Thermodynamic Calculations.....</i>  | <i>S16</i> |
| 6.  | <i>Iminium and Dibutylphosphate <math>pK_a</math> Determination. ....</i>    | <i>S20</i> |
| 7.  | <i>Electrolysis under Buffered Conditions.....</i>                           | <i>S21</i> |
| 8.  | <i>DFT calculations.....</i>                                                 | <i>S24</i> |
| 9.  | <i>Assessment of Overpotential with a Ruthenium Polypyridyl Complex.....</i> | <i>S27</i> |
| 10. | <i>Compounds Characterization.....</i>                                       | <i>S28</i> |
| 11. | <i>NMR Spectra.....</i>                                                      | <i>S30</i> |
| 12. | <i>References.....</i>                                                       | <i>S33</i> |

## 1. General Experimental Considerations

1.1 Solvent and Reagents: organic solvents were obtained from an LC Technology Solutions Inc. solvent purification system using columns containing molecular sieves under argon; all commercially available compounds were used as received.

1.2 Characterization of Products:  $^1\text{H}$ ,  $^{13}\text{C}$ , and  $^{19}\text{F}$  NMR spectra were recorded on Bruker 400 or 500 MHz spectrometers. Chemical shifts are given in parts per million (ppm) relative to residual solvent peaks in the  $^1\text{H}$  and  $^{13}\text{C}$  NMR spectra or are referenced as noted. The following abbreviations (and their combinations) are used to label the multiplicities: s (singlet), d (doublet), t (triplet), m (multiplet) and br (broad). High-resolution mass spectra were obtained using a Thermo Q Exactive<sup>TM</sup> Plus by the mass spectrometry facility at the University of Wisconsin. Chromatographic purification of products was accomplished by chromatography on silica gel 60 M (particle size 40-63  $\mu\text{m}$ , 230-400 mesh) from MACHEREY-NAGEL Inc. Thin-layer chromatography (TLC) was performed on Silicycle silica gel UV254 pre-coated plates (0.25 mm).

1.3 Voltammetry Experiments: all cyclic voltammetric (CV) experiments were performed using Nuvant Array PGStats, from Nuvant System Inc. The experiments were carried out in a three-electrode cell configuration with a glassy carbon (GC) working electrode (3 mm diameter), and a platinum wire counter electrode ( $\sim 1.0$  cm, spiral wire). The working electrode potentials were measured versus Ag/AgNO<sub>3</sub> reference electrode (internal solution, 0.1 M Bu<sub>4</sub>NClO<sub>4</sub> and 0.01 M AgNO<sub>3</sub> in CH<sub>3</sub>CN). The redox potential of ferrocene/ferrocenium (Fc<sup>+</sup>/Fc) was measured (same experimental conditions) and used to provide an internal reference. The potential values were then adjusted relative to Fc<sup>+</sup>/Fc, and electrochemical studies in organic solvents were recorded accordingly. The GC working electrode was polished with alumina powder (5  $\mu\text{m}$ ) before each experiment.

## 2. General Procedures for Bulk Electrolysis (BE)

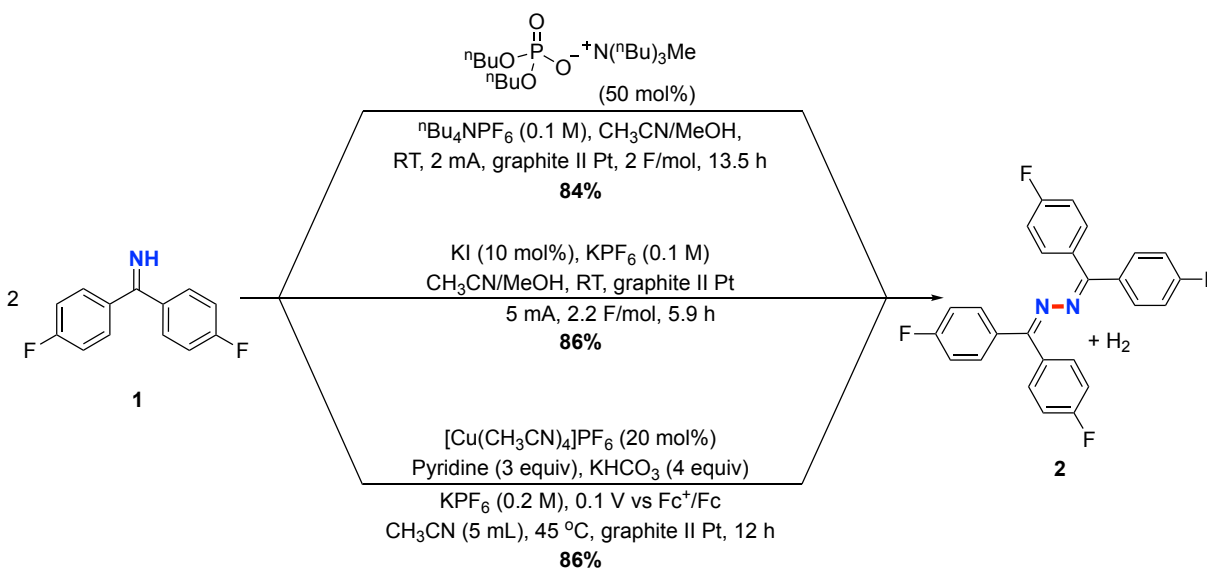

**Scheme S1.** Optimized conditions for bulk electrolysis

**2.1 Phosphate-promoted electrolysis (undivided cell):** Reactions were carried out with a graphite rod anode (0.6 cm OD x 6 cm L, ~ 3 cm was immersed in the solution, apparent surface area ~ 6 cm<sup>2</sup>), a platinum wire cathode (~1.0 cm, spiral wire) and a  $\text{Ag}^+/\text{Ag}$  reference electrode. A mixture of **1** (0.5 mmol, 1.0 equiv),  $n\text{Bu}_4\text{NPF}_6$  (0.5 mmol, 0.1 M) as supporting electrolyte,  $[\text{MeBu}_3\text{N}][\text{OP}(\text{O})(\text{OBu})_2]$  (0.25 mmol, 50 mol%), and MeOH (4.0 mmol, 8.0 equiv) in acetonitrile (5 mL) was electrolyzed under constant current at 2 mA with magnetic stirring. The reaction was stopped automatically after passing 2 F/mol (13.5 h). The reaction was analyzed by crude  $^{19}\text{F}$  NMR spectroscopy with  $\alpha,\alpha,\alpha$ -trifluorotoluene as internal standard.

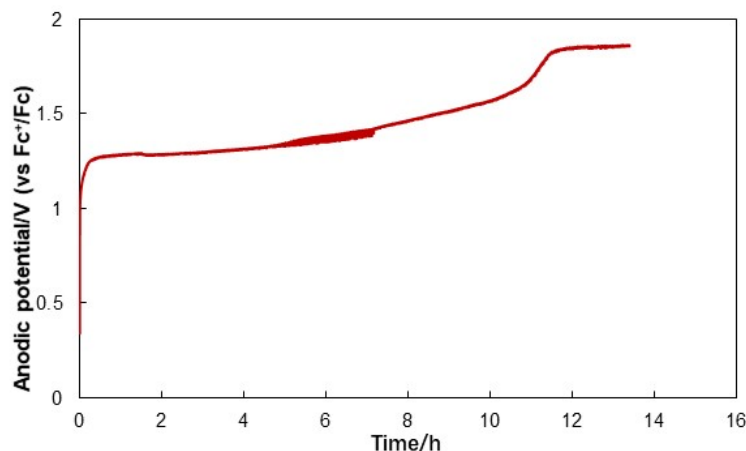

**Figure S1.** Representative anodic potential trace of phosphate-promoted electrolysis

2.2 Iodide-mediated electrolysis (undivided cell): Reactions were carried out with a graphite rod anode (0.6 cm OD x 6 cm L, ~ 3 cm was immersed in the solution, apparent surface area ~ 6 cm<sup>2</sup>), a platinum wire cathode (~1.0 cm, spiral wire) and a Ag<sup>+</sup>/Ag reference electrode. A mixture of **1** (0.5 mmol, 1.0 equiv), KPF<sub>6</sub> (0.5 mmol, 0.1 M), KI (0.05 mmol, 10 mol%), and MeOH (6.0 mmol, 12.0 equiv) in acetonitrile (5 mL) was electrolyzed under constant current at 5 mA with magnetic stirring. The reaction was stopped automatically after passing 2.2 F/mol (5.9 h). The reaction was analyzed by crude <sup>19</sup>F NMR spectroscopy with  $\alpha,\alpha,\alpha$ -trifluorotoluene as internal standard.

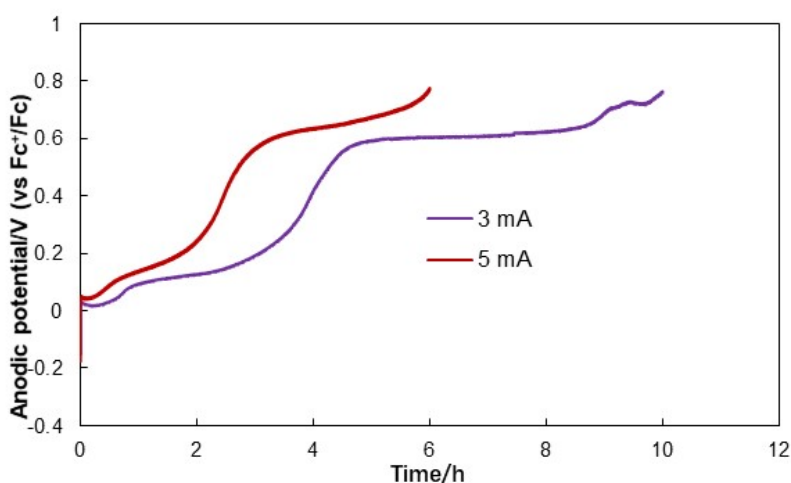

**Figure S2.** Representative anodic potential traces of iodide-mediated electrolysis

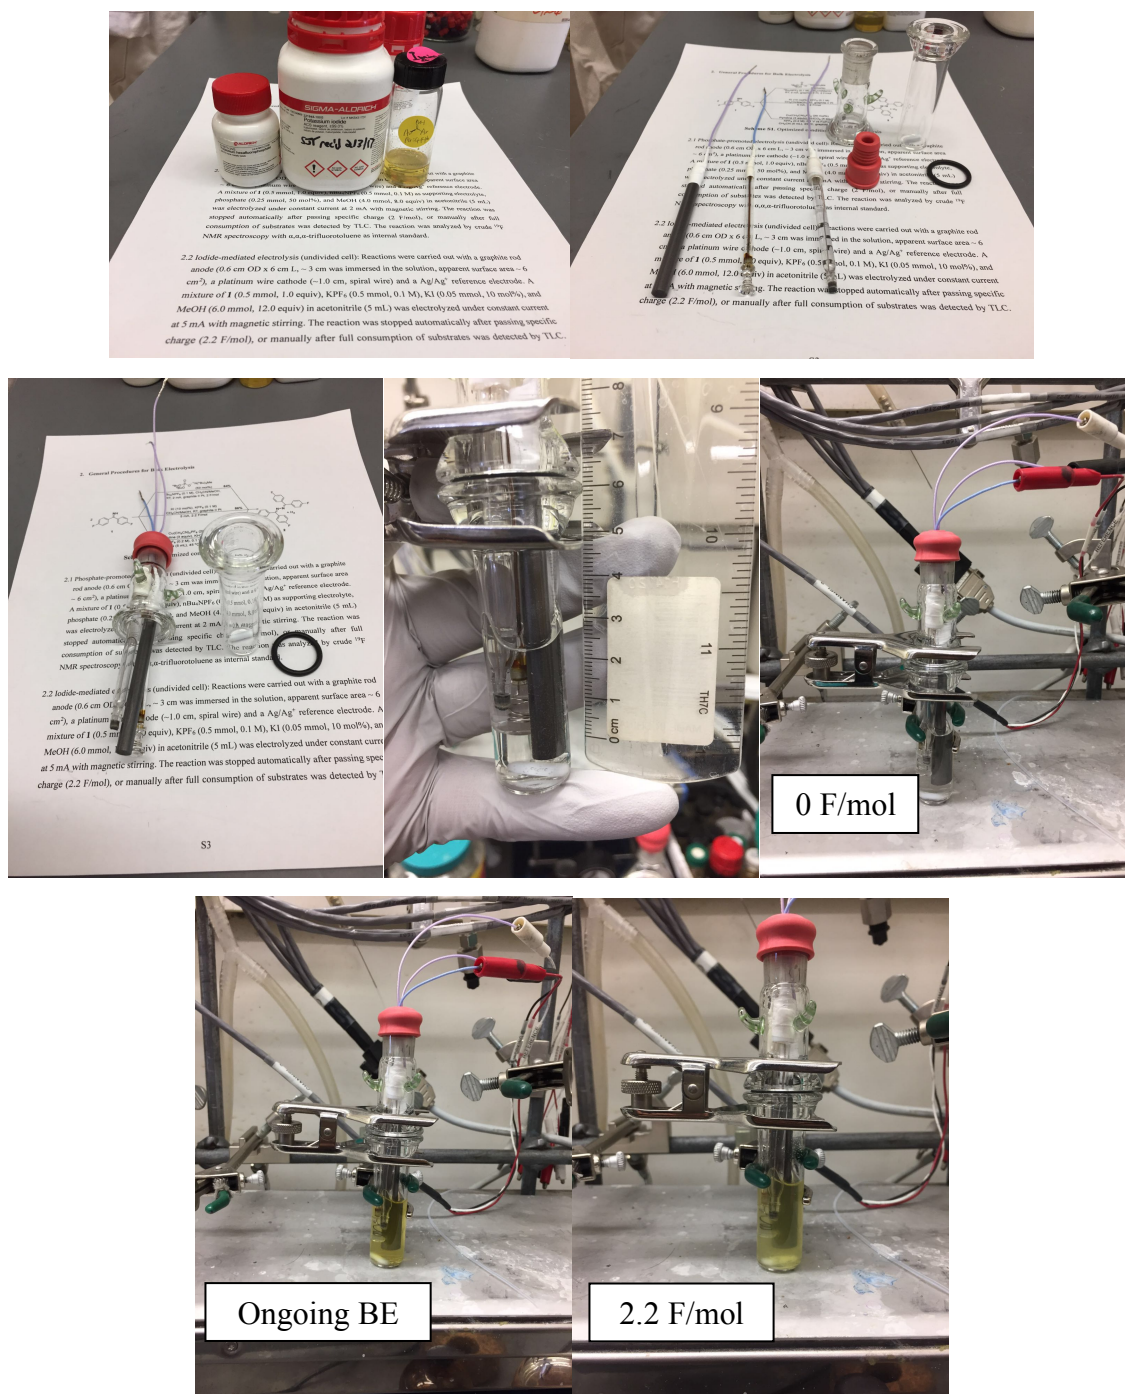

**Figure S3.** Graphical guide for iodide-mediated electrochemical imine (1) homocoupling.

2.3 Copper-mediated electrolysis (divided cell): Reactions were carried out with a graphite rod anode (0.6 cm OD x 6 cm L, ~ 4 cm was immersed in the solution, apparent surface area ~ 7.5 cm<sup>2</sup>), a platinum wire cathode (~1.0 cm, spiral wire) and a Ag<sup>+</sup>/Ag reference electrode. In the anodic chamber, **1** (0.5 mmol), [Cu(CH<sub>3</sub>CN)<sub>4</sub>]PF<sub>6</sub> (0.1 mmol, 20 mol%), pyridine (1.5 mmol, 3 equiv.), KHCO<sub>3</sub> (2.0 mmol, 4 equiv.), KPF<sub>6</sub> (1.0 mmol, 0.2 M) were added into CH<sub>3</sub>CN (5.0 mL). In the cathodic chamber was placed KPF<sub>6</sub> (1.0 mmol, 0.2 M), MeOH (4 mmol, 0.8 M) and CH<sub>3</sub>CN (5.0 mL). The solution was purged with nitrogen for 10 min, after which the bulk electrolysis was performed at 45 °C under constant potential at 0.1 V vs Fc<sup>+</sup>/Fc. At the starting point, a yellow solution was observed that arised from coordination of imine with copper. The yellow color disappeared after charging for about 30 min. The initial current was around 6 mA (± 1 mA) and decreased to less than 1 mA after about 4 h. The reaction was allowed to run for 12 h and at that time the current reached to baseline. Then, solution in both chambers were collected and analyzed by crude <sup>19</sup>F NMR spectroscopy with α,α,α-trifluorotoluene as internal standard.

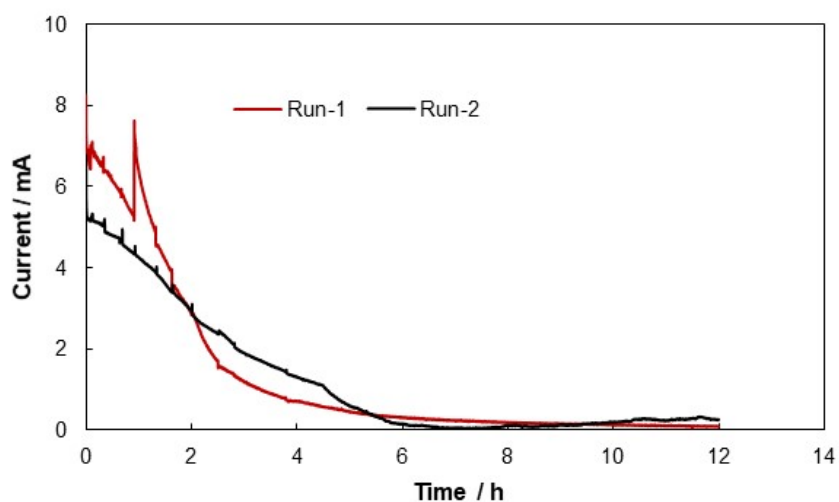

**Figure S4.** Representative current traces of Cu-mediated electrolysis under constant potential

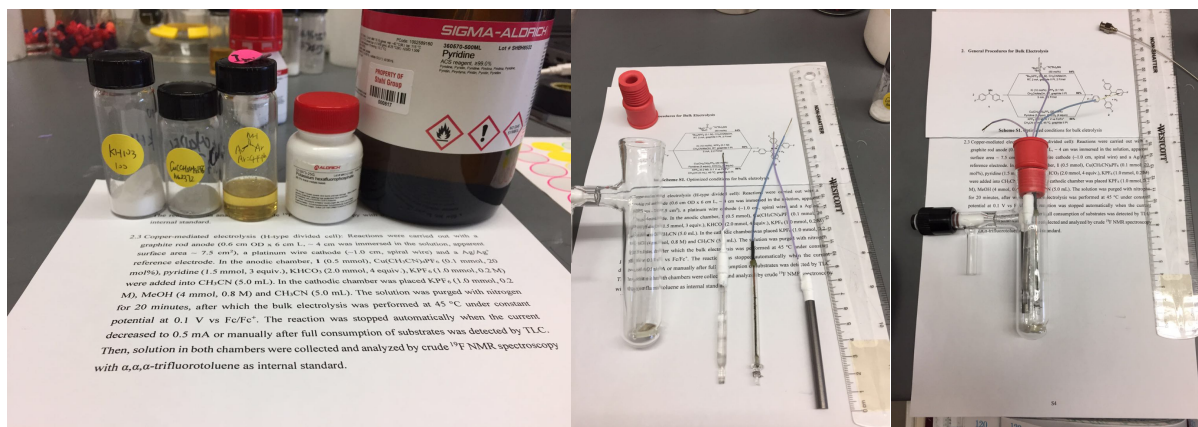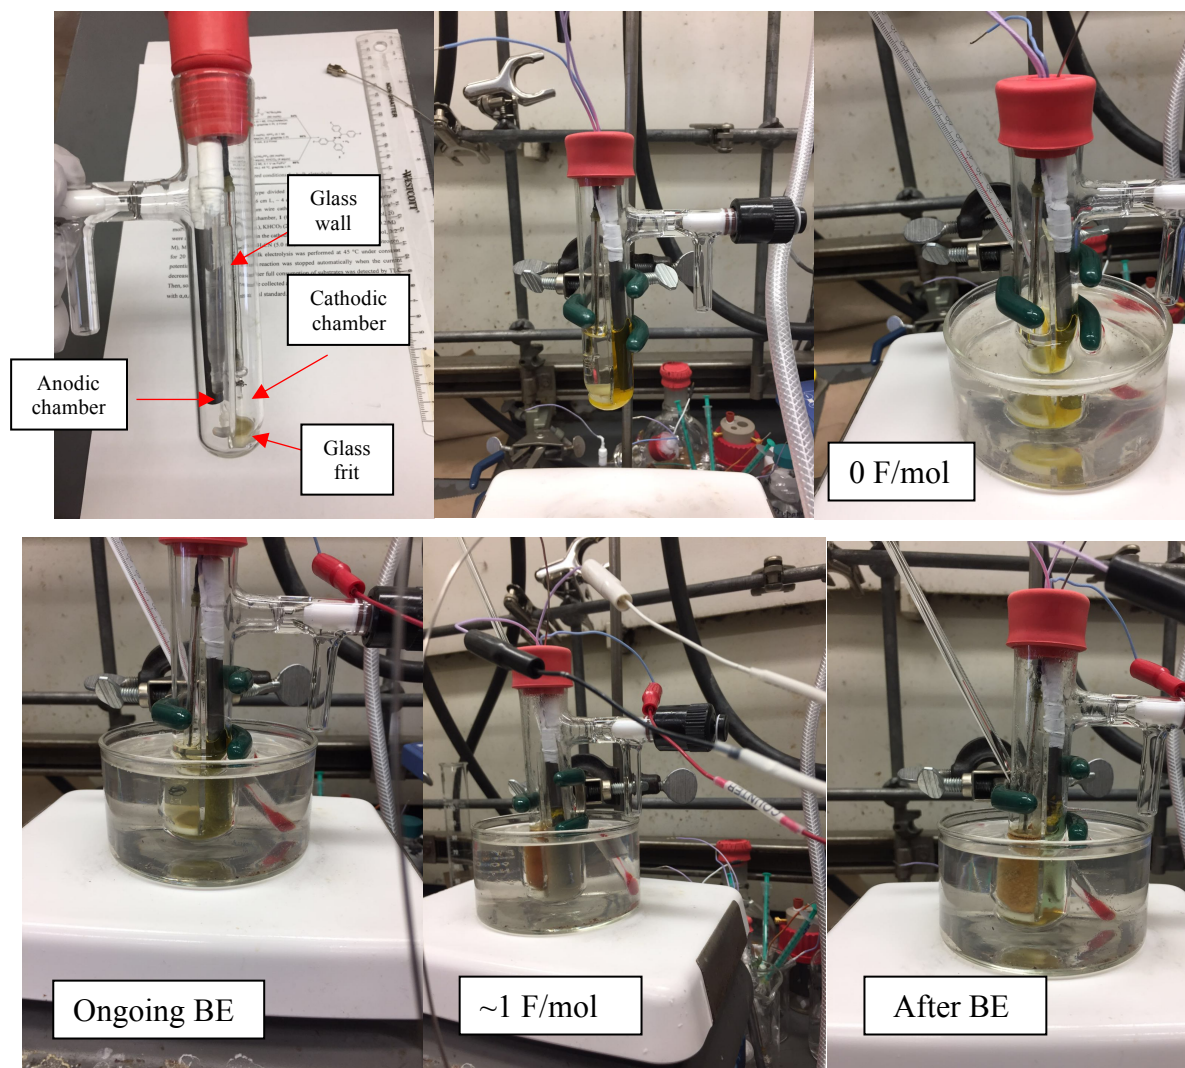

(continued on next page)

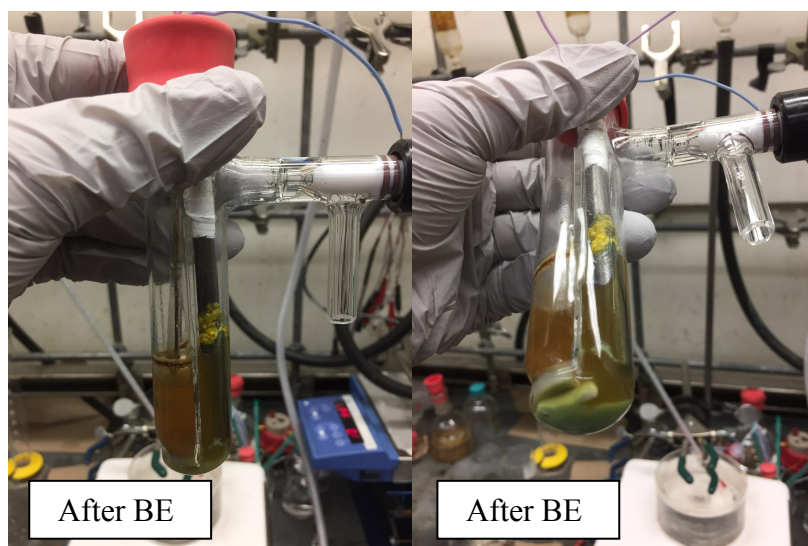

**Figure S5.** Graphical guide for Cu-mediated electrochemical imine (**1**) homocoupling.

### 3. Optimization of Reaction Conditions

**Table S1.** Base-promoted electrolysis

Ar =

| Entry           | Base                                                                 | Co-solvent                                  | Current/mA | Yield/% <sup>a</sup> |
|-----------------|----------------------------------------------------------------------|---------------------------------------------|------------|----------------------|
| 1               | -                                                                    | MeOH (8 eq.)                                | 4          | < 3%                 |
| 2               | 2,4,6-Collidine (0.5 eq.)                                            | MeOH (8 eq.)                                | 4          | 35%                  |
| 3               | 2,6-Lutidine (0.5 eq.)                                               | MeOH (8 eq.)                                | 4          | 10%                  |
| 4               | NaOAc (0.5 eq.)                                                      | MeOH (8 eq.)                                | 4          | n.d.                 |
| 5               | MeO-PhCO <sub>2</sub> Na (0.5 eq.)                                   | MeOH (8 eq.)                                | 4          | n.d.                 |
| 6               | N( <sup>n</sup> Bu) <sub>3</sub> MeOP(O)(OBu) <sub>2</sub> (0.5 eq.) | MeOH (8 eq.)                                | 4          | 71%                  |
| 7               | N( <sup>n</sup> Bu) <sub>3</sub> MeOP(O)(OBu) <sub>2</sub> (0.3 eq.) | MeOH (8 eq.)                                | 4          | 65%                  |
| 8               | N( <sup>n</sup> Bu) <sub>3</sub> MeOP(O)(OBu) <sub>2</sub> (0.1 eq.) | MeOH (8 eq.)                                | 4          | 22%                  |
| 9 <sup>b</sup>  | N( <sup>n</sup> Bu) <sub>3</sub> MeOP(O)(OBu) <sub>2</sub> (1.0 eq.) | MeOH (8 eq.)                                | 4          | 68%                  |
| 10              | N( <sup>n</sup> Bu) <sub>3</sub> MeOP(O)(OBu) <sub>2</sub> (0.5 eq.) | CF <sub>3</sub> CH <sub>2</sub> OH (8 eq.)  | 4          | 25%                  |
| 11              | N( <sup>n</sup> Bu) <sub>3</sub> MeOP(O)(OBu) <sub>2</sub> (0.5 eq.) | CF <sub>3</sub> CH <sub>2</sub> OH (12 eq.) | 4          | 23%                  |
| 12              | N( <sup>n</sup> Bu) <sub>3</sub> MeOP(O)(OBu) <sub>2</sub> (0.5 eq.) | -                                           | 4          | 35%                  |
| 13              | N( <sup>n</sup> Bu) <sub>3</sub> MeOP(O)(OBu) <sub>2</sub> (0.5 eq.) | MeOH (8 eq.)                                | 2          | 84%                  |
| 14              | N( <sup>n</sup> Bu) <sub>3</sub> MeOP(O)(OBu) <sub>2</sub> (0.5 eq.) | MeOH (8 eq.)                                | 6          | 33%                  |
| 15              | N( <sup>n</sup> Bu) <sub>3</sub> MeOP(O)(OBu) <sub>2</sub> (0.5 eq.) | MeOH (8 eq.)                                | 10         | 26%                  |
| 16              | N( <sup>n</sup> Bu) <sub>3</sub> MeOP(O)(OBu) <sub>2</sub> (0.5 eq.) | MeOH (4 eq.)                                | 2          | 84%                  |
| 17              | N( <sup>n</sup> Bu) <sub>3</sub> MeOP(O)(OBu) <sub>2</sub> (0.5 eq.) | MeOH (12 eq.)                               | 2          | 84%                  |
| 18 <sup>c</sup> | N( <sup>n</sup> Bu) <sub>3</sub> MeOP(O)(OBu) <sub>2</sub> (0.5 eq.) | MeOH (8 eq.)                                | 2          | < 3%                 |

<sup>a</sup>0.5 mmol scale with  $\alpha,\alpha,\alpha$ -trifluorotoluene as internal standard. <sup>b</sup>Without <sup>n</sup>Bu<sub>4</sub>NPF<sub>6</sub>. <sup>c</sup>With reticulated vitreous carbon (RVC, 30 PPI, 0.635\*1\*2 cm<sup>3</sup>, ~ 24 cm<sup>2</sup>) as working electrode.

Reactions were conducted following the general procedure shown in section 2.1, and deviations from the optimized conditions and corresponding yields were listed in Table S1.

**Table S2.** Iodide-mediated electrolysis

$2 \text{ Ar}-\text{C}(=\text{NH})-\text{Ar} \xrightarrow[\text{5 mA, 2.2 F/mol}]{\text{KI (10 mol\%), KPF}_6 \text{ (0.1 M), CH}_3\text{CN/MeOH, RT, graphite || Pt}} \text{ Ar}-\text{C}(=\text{N}-\text{N}=\text{Ar})-\text{Ar} + \text{H}_2$

| Entry | Catalysis                                 | Co-solvent                                 | Current/mA | Charge    | Yield/% <sup>a</sup> |
|-------|-------------------------------------------|--------------------------------------------|------------|-----------|----------------------|
| 1     | <sup>n</sup> Bu <sub>4</sub> NI (5 mol%)  | -                                          | 5          | 3 F/mol   | < 3%                 |
| 2     | <sup>n</sup> Bu <sub>4</sub> NI (5 mol%)  | MeOH (8 eq.)                               | 5          | 3 F/mol   | 38%                  |
| 3     | <sup>n</sup> Bu <sub>4</sub> NI (5 mol%)  | CF <sub>3</sub> CH <sub>2</sub> OH (8 eq.) | 5          | 3 F/mol   | 33%                  |
| 4     | <sup>n</sup> Bu <sub>4</sub> NI (5 mol%)  | HFIP (8 eq.)                               | 5          | 3 F/mol   | 19%                  |
| 5     | KI (5 mol%)                               | MeOH (8 eq.)                               | 5          | 3 F/mol   | 61%                  |
| 6     | Et <sub>4</sub> NBr (5 mol%)              | MeOH (8 eq.)                               | 5          | 3 F/mol   | n.d.                 |
| 7     | <sup>n</sup> Bu <sub>4</sub> NCl (5 mol%) | MeOH (8 eq.)                               | 5          | 3 F/mol   | n.d.                 |
| 8     | KI (5 mol%)                               | MeOH (8 eq.)                               | 5          | 2.2 F/mol | 74%                  |
| 9     | KI (5 mol%)                               | MeOH (4 eq.)                               | 5          | 2.2 F/mol | 67%                  |
| 10    | KI (5 mol%)                               | MeOH (12 eq.)                              | 5          | 2.2 F/mol | 82%                  |
| 11    | KI (7.5 mol%)                             | MeOH (8 eq.)                               | 5          | 2.2 F/mol | 80%                  |
| 12    | KI (10 mol%)                              | MeOH (8 eq.)                               | 5          | 2.2 F/mol | 84%                  |
| 13    | KI (10 mol%)                              | MeOH (12 eq.)                              | 5          | 2.2 F/mol | 86%                  |
| 14    | KI (10 mol%)                              | MeOH (12 eq.)                              | 5          | 2.0 F/mol | 81%                  |
| 15    | KI (10 mol%)                              | MeOH (12 eq.)                              | 5          | 1.8 F/mol | 75%                  |
| 16    | KI (10 mol%)                              | MeOH (12 eq.)                              | 5          | 1.5 F/mol | 38%                  |
| 17    | KI (10 mol%)                              | MeOH (12 eq.)                              | 5          | 1.2 F/mol | 8%                   |
| 18    | KI (10 mol%)                              | MeOH (12 eq.)                              | 3          | 2.2 F/mol | 84%                  |
| 19    | KI (10 mol%)                              | MeOH (12 eq.)                              | 8          | 2.2 F/mol | 86%                  |

<sup>a</sup>0.5 mmol scale with  $\alpha,\alpha,\alpha$ -trifluorotoluene as internal standard. n.d. = not detected.

Reactions were conducted following the general procedure shown in section 2.2, and deviations from the optimized conditions and corresponding yields were listed in Table S2.

**Table S3.** Copper-mediated electrolysis

| $  \begin{array}{ccc}  & \text{Cu}(\text{CH}_3\text{CN})_4\text{PF}_6 \text{ (20 mol\%)} \\  & \text{Pyridine (3.0 equiv)} \\  \text{2 } \text{Ar}-\text{C}(\text{NH})=\text{Ar} & \xrightarrow[\text{45 } ^\circ\text{C, graphite    Pt, 12 h}]{\text{KHCO}_3 \text{ (4.0 equiv), KPF}_6 \text{ (0.2 M)}} & \text{Ar}-\text{C}(\text{N}=\text{N})=\text{C}(\text{Ar})-\text{Ar} + \text{H}_2 \\  & \text{@ 0.1 V vs Fc}^+/\text{Fc, CH}_3\text{CN (5 mL),}  \end{array}  $ |                                                             |                      |
|-----------------------------------------------------------------------------------------------------------------------------------------------------------------------------------------------------------------------------------------------------------------------------------------------------------------------------------------------------------------------------------------------------------------------------------------------------------------------------|-------------------------------------------------------------|----------------------|
| Entry                                                                                                                                                                                                                                                                                                                                                                                                                                                                       | Deviation from standard conditions                          | Yield/% <sup>a</sup> |
| 1                                                                                                                                                                                                                                                                                                                                                                                                                                                                           | none                                                        | 86                   |
| 2                                                                                                                                                                                                                                                                                                                                                                                                                                                                           | K <sub>2</sub> CO <sub>3</sub> instead of KHCO <sub>3</sub> | 34                   |
| 3                                                                                                                                                                                                                                                                                                                                                                                                                                                                           | K <sub>3</sub> PO <sub>4</sub> instead of KHCO <sub>3</sub> | 4                    |
| 4                                                                                                                                                                                                                                                                                                                                                                                                                                                                           | NaHCO <sub>3</sub> instead of KHCO <sub>3</sub>             | 54                   |
| 5                                                                                                                                                                                                                                                                                                                                                                                                                                                                           | without KHCO <sub>3</sub>                                   | 15                   |
| 6                                                                                                                                                                                                                                                                                                                                                                                                                                                                           | TBAPF <sub>6</sub> instead of KPF <sub>6</sub>              | 79                   |
| 7                                                                                                                                                                                                                                                                                                                                                                                                                                                                           | 2 equiv of pyridine                                         | 75                   |
| 8                                                                                                                                                                                                                                                                                                                                                                                                                                                                           | 4 equiv of pyridine                                         | 86                   |
| 9                                                                                                                                                                                                                                                                                                                                                                                                                                                                           | at room temperature                                         | 46                   |
| 10                                                                                                                                                                                                                                                                                                                                                                                                                                                                          | applied potential @ 0 mV vs Fc/Fc <sup>+</sup>              | 72                   |
| 11                                                                                                                                                                                                                                                                                                                                                                                                                                                                          | 10 mol% Cu(I)                                               | 77                   |

<sup>a</sup>0.5 mmol scale with  $\alpha,\alpha,\alpha$ -Trifluorotoluene as internal standard.

Reactions were conducted following the general procedure shown in section 2.3, and deviations from the optimized conditions and corresponding yields were listed in Table S3.

#### 4. Cyclic Voltammetry Studies

The following CVs provide additional data beyond those shown in Figures 2B, 3B, and 4B in the manuscript.

##### 4.1 Imine **1** with or without phosphate.

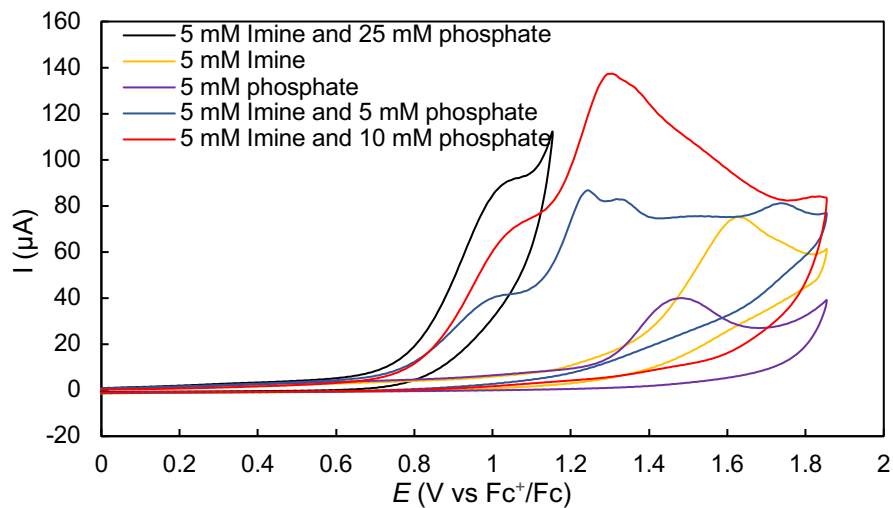

**Figure S6.** CV studies of **1** (5 mM) with or without phosphate in acetonitrile with  $n\text{Bu}_4\text{NPF}_6$  (0.1 M) as supporting electrolyte, glassy carbon as working electrode ( $\sim 7.0 \text{ mm}^2$ ) and a platinum wire (1.0 cm, spiral wire) as counter electrode, scan rate = 20 mV/s.

##### 4.2 Iodide-mediated conditions.

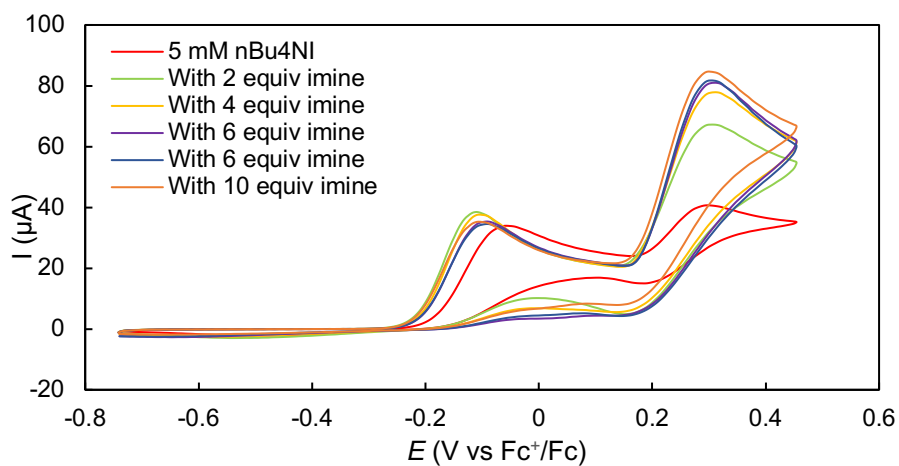

**Figure S7.** CV studies of  ${}^n\text{Bu}_4\text{NI}$  with or without **1**. Conditions: 5 mM  ${}^n\text{Bu}_4\text{NI}$  in  $\text{CH}_3\text{CN}$  (10 mL), 0.1 M  ${}^n\text{Bu}_4\text{NPF}_6$  with different amount of **1**, glassy carbon as working electrode ( $\sim 7.0 \text{ mm}^2$ ) and a platinum wire (1.0 cm, spiral wire) as counter electrode, scan rate = 20 mV/s.

#### 4.3 CVs of Cu(I) with or without pyridine.

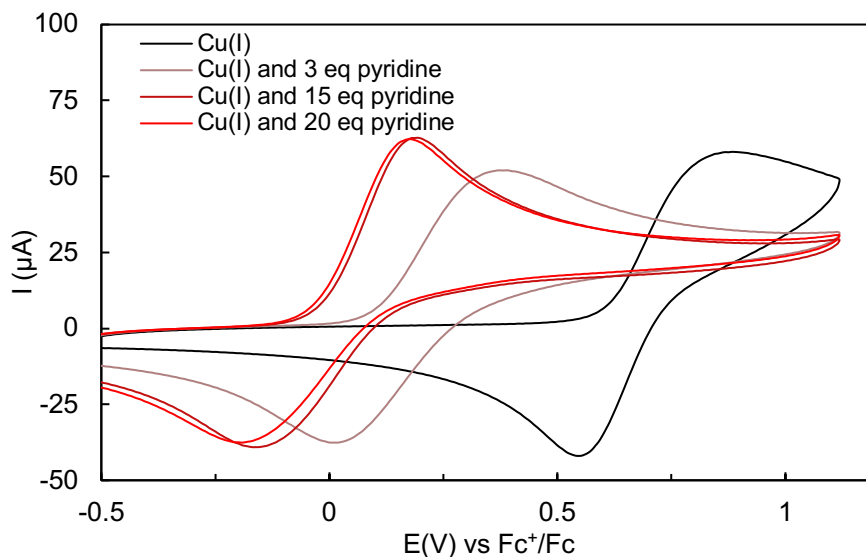

**Figure S8.** CV of  $[\text{Cu}(\text{CH}_3\text{CN})_4]\text{PF}_6$  (5 mM) and pyridine in acetonitrile with  $\text{KPF}_6$  (0.1 M) as supporting electrolyte, glassy carbon as working electrode ( $\sim 7.0 \text{ mm}^2$ ) and a platinum wire (1.0 cm, spiral wire) as counter electrode, scan rate = 100 mV/s.

#### 4.4 CVs of Cu(I) in the presence of different concentration of imine **1**.

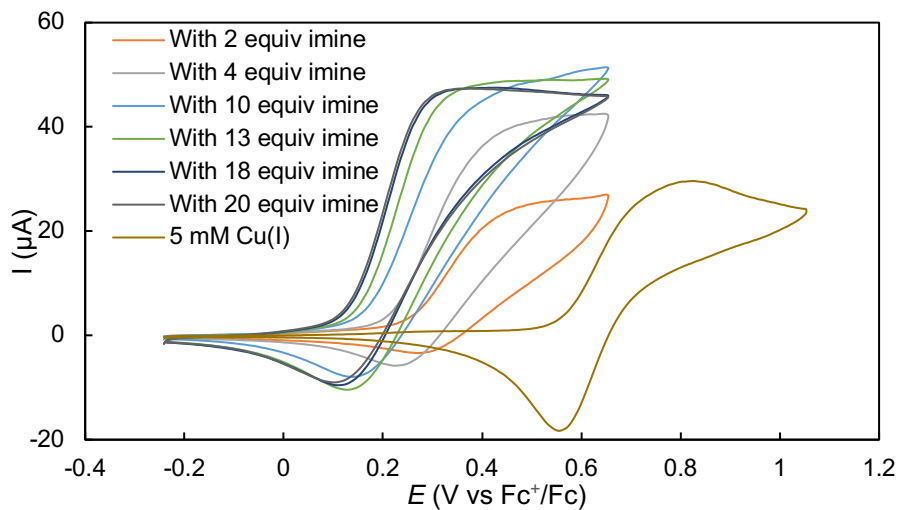

**Figure S9.** CV of  $[\text{Cu}(\text{CH}_3\text{CN})_4]\text{PF}_6$  (5 mM) and **1** in acetonitrile with  ${}^n\text{Bu}_4\text{NPF}_6$  (0.1 M) as supporting electrolyte, glassy carbon as working electrode ( $\sim 7.0 \text{ mm}^2$ ) and a platinum wire (1.0 cm, spiral wire) as counter electrode, scan rate = 20 mV/s.

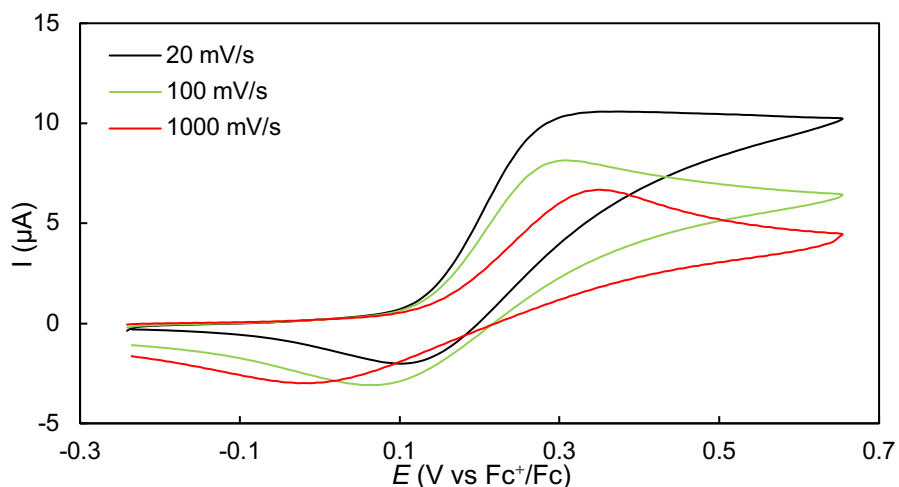

**Figure S10.** Normalized CV of  $[\text{Cu}(\text{CH}_3\text{CN})_4]\text{PF}_6$  (5 mM) and **1** (100 mM) at different scan rates in acetonitrile with  ${}^n\text{Bu}_4\text{NPF}_6$  (0.1 M) as supporting electrolyte, glassy carbon as working electrode ( $\sim 7.0 \text{ mm}^2$ ) and a platinum wire (1.0 cm, spiral wire) as counter electrode.

The data in Figure S10 were modeled using the software ESP v. 2.4.<sup>1</sup> Using an oversimplified model, some kinetic parameters were able to be estimated. The model consisted of a reversible electrochemical step followed by a chemical step that is second-order in  $\text{Cu}^{+2}$  and that regenerates  $\text{Cu}^{+1}$ . It is expected that imine substrate will be coordinated to redox-active Cu species involved in these steps (i.e.,  $\text{L}$  = imine or acetonitrile solvent). Using these assumptions, a fit of the experimental data led to a chemical rate constant for N–N coupling of  $16 \text{ M}^{-1}\text{s}^{-1}$  (cf. second step in Figure S11). Although this value is only a rough estimation, it suggests that the bulk electrolysis experiments are limited by mass transport, rather than chemical kinetics, because the rate constant implies a reaction time of  $< 1 \text{ min}$ , if it were limited solely by chemical kinetics.

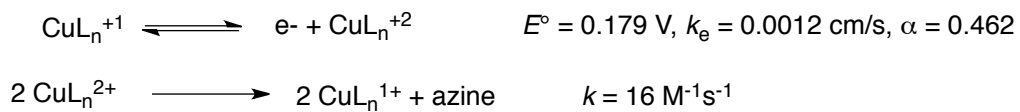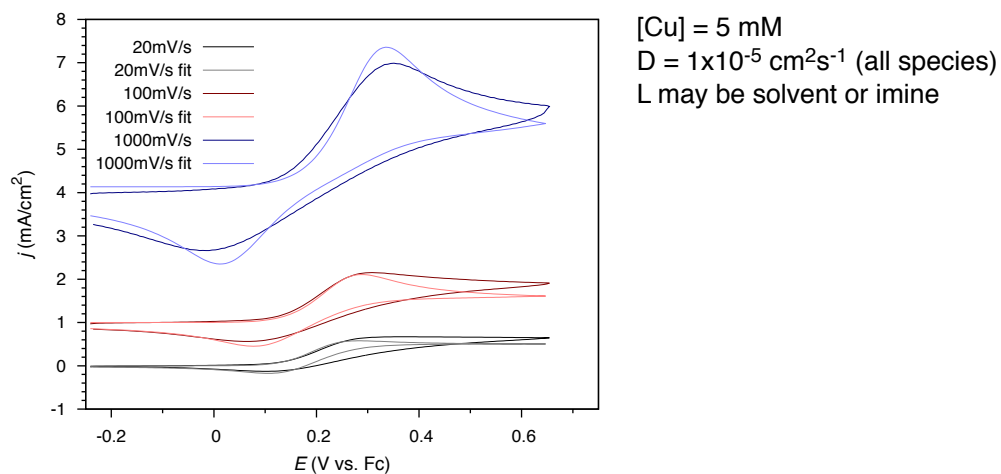

**Figure S11.** E-C model and parameters with simulated and experimental CV data at different scan rates, other conditions being equal. Experimental data are identical to those in Figure S10.

## 5. Pourbaix Diagram Data Collection and Thermodynamic Calculations

The experiments were carried out in a three-electrode cell configuration with a glassy carbon (GC) working electrode (3 mm diameter), and a platinum wire counter electrode (~1.0 cm, spiral wire), and  ${}^n\text{Bu}_4\text{NPF}_6$  (0.1 M) as supporting electrolyte. The working electrode potentials were measured versus Ag/AgNO<sub>3</sub> reference electrode (internal solution, 0.1 M Bu<sub>4</sub>NClO<sub>4</sub> and 0.01 M AgNO<sub>3</sub> in CH<sub>3</sub>CN). The redox potential of ferrocene/ferrocenium (Fc<sup>+</sup>/Fc) was measured (same experimental conditions) and the potential values were then adjusted relative to Fc<sup>+</sup>/Fc. Because some of the peak currents were ill-defined, the inflection point of each relevant oxidation feature (the dots in Figures S12-S14) was chosen as an approximate  $E_{1/2}$  for the Pourbaix analysis. The data of each entry was collected three times and reported as an average in the Pourbaix diagram. All of the experiments were conducted at room temperature.

**Table S4.** Different buffer conditions for acquisition of CV data used in the Pourbaix diagram

| Entry           | Mediator                         | Imine  | 2,6-Lutidine | 2,4,6-Collidine | dibutyl phosphate | TfOH <sup>b</sup> | Scan rate |
|-----------------|----------------------------------|--------|--------------|-----------------|-------------------|-------------------|-----------|
| 1               | No                               | 10 mM  | No           | No              | No                | 5 mM              | 20 mV/s   |
| 2               | No                               | 5 mM   | No           | 100 mM          | No                | 50 mM             | 20 mV/s   |
| 3               | No                               | 5 mM   | No           | No              | 20 mM             | 10 mM             | 20 mV/s   |
| 4               | ${}^n\text{Bu}_4\text{NI}$ /5 mM | 100 mM | No           | No              | No                | 50 mM             | 20 mV/s   |
| 5               | ${}^n\text{Bu}_4\text{NI}$ /5 mM | 50 mM  | 100 mM       | No              | No                | 50 mM             | 20 mV/s   |
| 6               | ${}^n\text{Bu}_4\text{NI}$ /5 mM | 50 mM  | No           | 100 mM          | No                | 50 mM             | 20 mV/s   |
| 7               | ${}^n\text{Bu}_4\text{NI}$ /5 mM | 50 mM  | No           | No              | 100 mM            | 50 mM             | 20 mV/s   |
| 8 <sup>a</sup>  | Cu(I)/5 mM                       | 200 mM | No           | No              | No                | 100 mM            | 20 mV/s   |
| 9 <sup>a</sup>  | Cu(I)/5 mM                       | 100 mM | 20 mM        | No              | No                | 10 mM             | 20 mV/s   |
| 10 <sup>a</sup> | Cu(I)/5 mM                       | 100 mM | No           | 20 mM           | No                | 10 mM             | 20 mV/s   |

<sup>a</sup>Cu(I) refers to [Cu(CH<sub>3</sub>CN)<sub>4</sub>]PF<sub>6</sub>; <sup>b</sup>TfOH refers to triflic acid.

**Table S5.** Redox potentials for imine oxidation and associated pK<sub>a</sub>s for the Pourbaix diagram

| Entry | Mediator | Buffer pK <sub>a</sub> | Potential/V (vs Fc <sup>+</sup> /Fc) <sup>a</sup> |
|-------|----------|------------------------|---------------------------------------------------|
| 1     | No       | 13.3                   | 1.45                                              |
| 2     | No       | 14.98                  | 1.30                                              |
| 3     | No       | 18.2                   | 1.2                                               |

|    |                                                       |       |      |
|----|-------------------------------------------------------|-------|------|
| 4  | <sup>n</sup> Bu <sub>4</sub> NI                       | 13.3  | 0.28 |
| 5  | <sup>n</sup> Bu <sub>4</sub> NI                       | 14.13 | 0.25 |
| 6  | <sup>n</sup> Bu <sub>4</sub> NI                       | 14.98 | 0.26 |
| 7  | <sup>n</sup> Bu <sub>4</sub> NI                       | 18.2  | 0.30 |
| 8  | [Cu(CH <sub>3</sub> CN) <sub>4</sub> ]PF <sub>6</sub> | 13.3  | 0.20 |
| 9  | [Cu(CH <sub>3</sub> CN) <sub>4</sub> ]PF <sub>6</sub> | 14.13 | 0.23 |
| 10 | [Cu(CH <sub>3</sub> CN) <sub>4</sub> ]PF <sub>6</sub> | 14.98 | 0.23 |

<sup>a</sup>The potential refers to the inflection point of each related oxidation feature.

In a process similar to the one used to generate Scheme 1, literature data for the N<sub>2</sub>/NH<sub>4</sub><sup>+</sup> and N<sub>2</sub>/N<sub>2</sub>H<sub>5</sub><sup>+</sup> potentials can be combined to produce the N<sub>2</sub>H<sub>5</sub><sup>+</sup>/NH<sub>4</sub><sup>+</sup> potential (Scheme S2).<sup>2</sup> With some further arithmetic utilizing Scheme 1C as well, the N<sub>2</sub>H<sub>5</sub><sup>+</sup>/NH<sub>3</sub> potential is obtained to cover the pK<sub>a</sub> 16.5 to 16.6 region of the Pourbaix diagram in between the NH<sub>4</sub><sup>+</sup> and N<sub>2</sub>H<sub>5</sub><sup>+</sup> pK<sub>a</sub>s. With the computed azine ammonolysis value and the experimentally measured iminium pK<sub>a</sub> (vide infra), the potential for azine reduction to the iminium is obtained.

**Scheme S2.** Thermodynamic Data for Interconversion of N<sub>2</sub>/N<sub>2</sub>H<sub>5</sub><sup>+</sup>/NH<sub>4</sub><sup>+</sup> and Azine/Iminium in MeCN

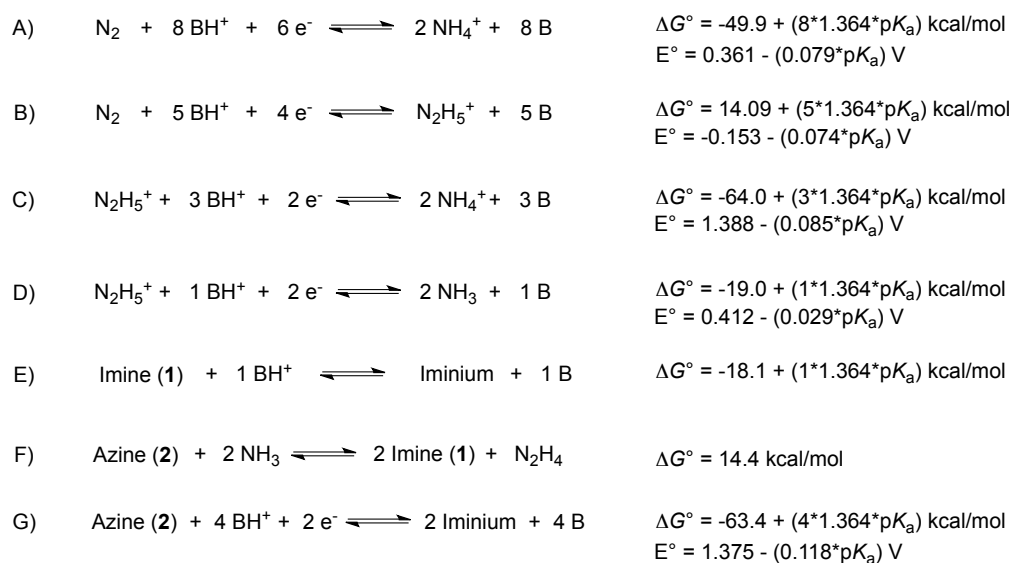

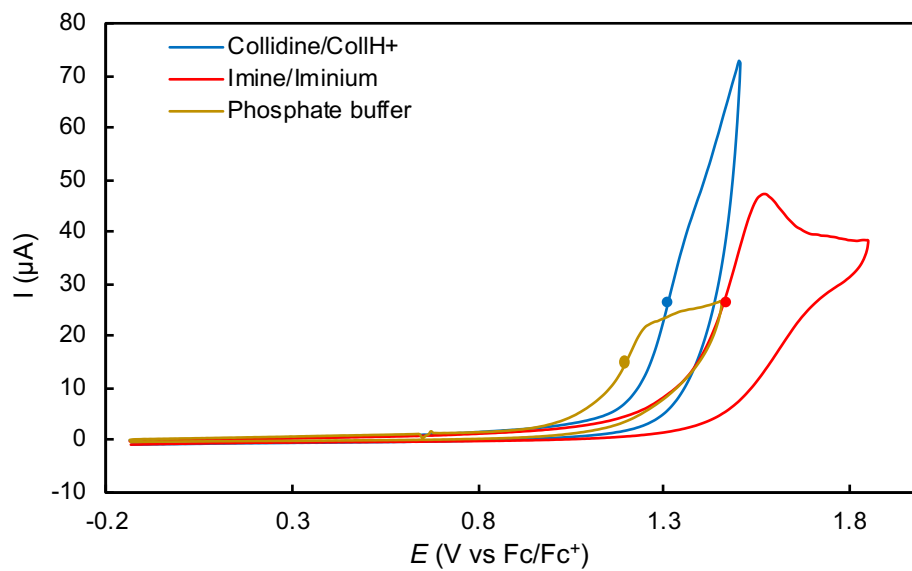

**Figure S12.** CVs of base-promoted system under different buffer conditions

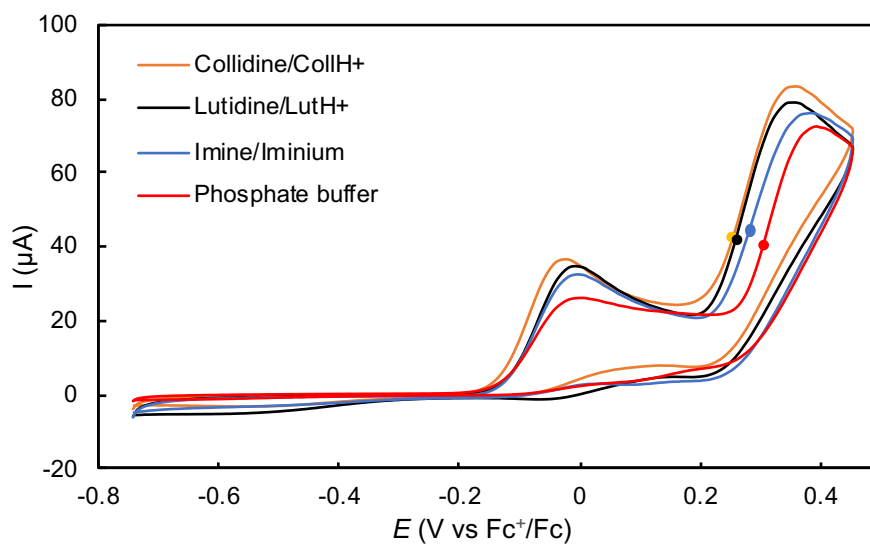

**Figure S13.** CVs of iodide-mediated system under different buffer conditions

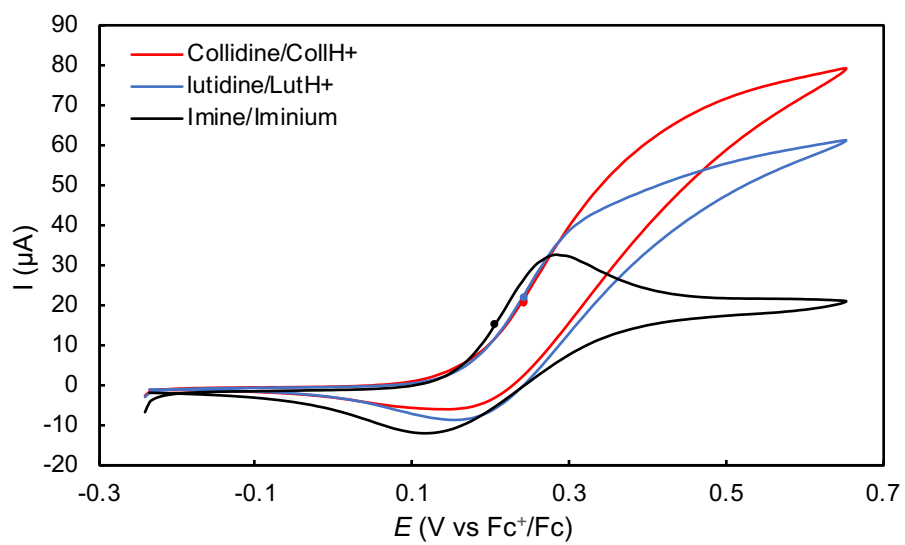

**Figure S14.** CVs of copper-mediated system under different buffer conditions

## 6. Iminium and Dibutylphosphate $pK_a$ Determination.

NMR techniques were used to measure the  $pK_a$  values.<sup>3</sup> For the iminium  $pK_a$ , NMR spectra were taken of the imines in  $CD_3CN$  and in the presence of an excess of a relatively strong acid compared to the iminium (4-nitrobenzenesulfonic acid was used). Next, spectra of the imine in the presence of a test acid were taken. Reference spectra of each test acid and its conjugate base were also taken. Then, chemical shifts were put into eq S1, where  $\delta_O$  is the observed  $\delta$  of the imine in the presence of the test acid,  $\delta_{HA}$  is the  $\delta$  of the iminium,  $\delta_A$  is the  $\delta$  of the imine,  $\delta_T$  is the observed  $\delta$  of the test acid in the presence of the imine,  $\delta_B$  is the  $\delta$  of the test acid conjugate base, and  $\delta_{HB}$  is the  $\delta$  of the test acid. This procedure was repeated with various test acids until acids with closely spaced  $pK_a$ s bracketing the calculated iminium  $pK_a$  gave a consistent result. From the ratio of  $K_{HA}/K_{HB}$ , the  $pK_a$  of the iminium (tabulated in the main text) is readily obtained by eq S2. The dibutylphosphate  $pK_a$  was measured similarly, using tosylic acid to obtain the fully-protonated form. To minimize ion-pairing effects, cationic acids were used to measure the iminium  $pK_a$  and neutral acids were used for the dibutylphosphate  $pK_a$ .

$$((\delta_O - \delta_{HA})/(\delta_A - \delta_O)) * ((\delta_T - \delta_B)/(\delta_{HB} - \delta_T)) = K_{HA}/K_{HB} \quad (S1)$$

$$pK_{a(HA)} = pK_{a(HB)} - \log_{10}(K_{HA}/K_{HB}) \quad (S2)$$

**Table S6.** Test acid and iminium  $pK_a$  values in acetonitrile

| Test Acid                                      | $pK_a$             |
|------------------------------------------------|--------------------|
| 2-methoxypyridinium                            | 9.93 <sup>a</sup>  |
| N,N-dimethylanilinium                          | 11.43 <sup>a</sup> |
| pyridinium                                     | 12.53 <sup>a</sup> |
| 2,6-lutidinium                                 | 14.13 <sup>a</sup> |
| 2,4,6-collidinium                              | 14.98 <sup>a</sup> |
| 2-aminobenzimidazolium                         | 16.08 <sup>a</sup> |
| 4,4'-difluorobenzophenone iminium ( <b>1</b> ) | 13.28              |
| phthalic acid                                  | 14.3 <sup>b</sup>  |
| saccharin                                      | 14.57 <sup>b</sup> |
| 2-nitrobenzoic acid                            | 18.2 <sup>b</sup>  |
| 4-nitrobenzoic acid                            | 18.7 <sup>b</sup>  |
| dibutylphosphonic acid                         | 18.2               |

<sup>a</sup>The test acid  $pK_a$  values are from Ref. <sup>4</sup> <sup>b</sup>These test acid  $pK_a$  values are from Ref. <sup>5</sup>

## 7. Electrolysis under Buffered Conditions

### 7.1 Iodide-mediated electrolysis

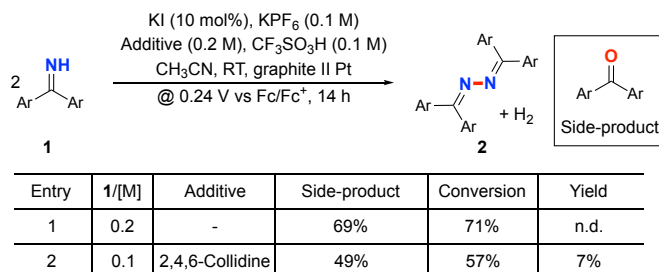

**Scheme S3.** Iodide-mediated electrolysis under buffer conditions

Entry 1 (imine/iminium buffer): Reaction was carried out with a graphite anode (0.6 cm OD x 6 cm L, ~ 3 cm was immersed in the solution), a platinum wire cathode (1.0 cm, spiral wire) and a  $\text{Ag}^+/\text{Ag}$  reference electrode. A mixture of **1** (1 mmol),  $\text{KPF}_6$  (0.5 mmol, 0.1 M) as supporting electrolyte, KI (0.05 mmol, 10 mol%), and triflic acid (0.5 mmol) in acetonitrile (5 mL) was electrolyzed overnight under constant potential at 0.24 V vs  $\text{Fc}^+/\text{Fc}$  with magnetic stirring. The result was analyzed by crude  $^{19}\text{F}$  NMR spectroscopy with  $\text{KPF}_6$  (supporting electrolyte) as internal standard, which showed that the substrate underwent hydrolysis predominately with no N–N bond formation product.

Entry 2 (collidine/collidinium buffer): Reaction was carried out with a graphite anode (0.6 cm OD x 6 cm L, ~ 3 cm was immersed in the solution), a platinum wire cathode (1.0 cm, spiral wire) and a  $\text{Ag}^+/\text{Ag}$  reference electrode. A mixture of **1** (0.5 mmol),  $\text{KPF}_6$  (0.5 mmol, 0.1 M) as supporting electrolyte, KI (0.05 mmol, 10 mol%), triflic acid (0.5 mmol) and 2,4,6-collidine (1.0 mmol) in acetonitrile (5 mL) was electrolyzed overnight under constant potential at 0.24 V vs  $\text{Fc}^+/\text{Fc}$  with magnetic stirring. The result was analyzed by crude  $^{19}\text{F}$  NMR spectroscopy with  $\text{KPF}_6$  (supporting electrolyte) as internal standard, which revealed that desired product was produced in a yield of 7%.

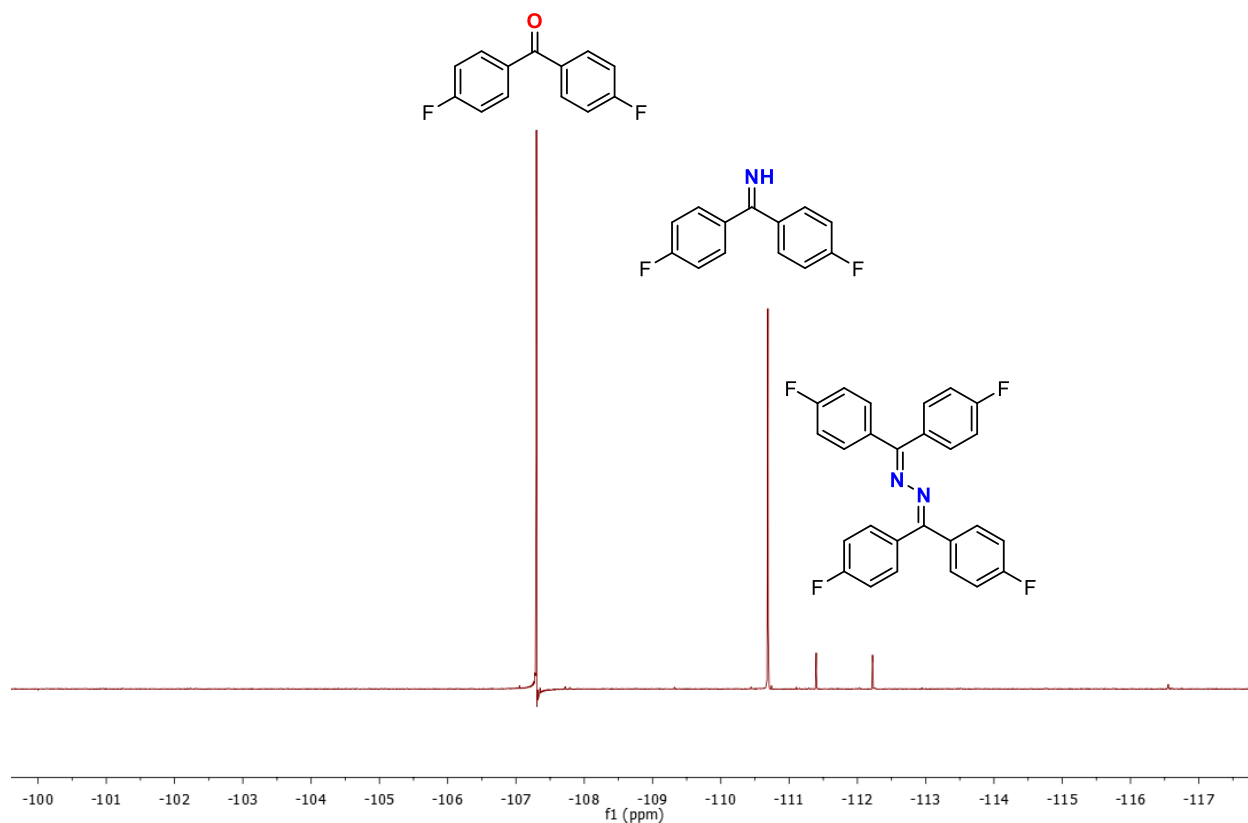

**Figure S15.** Crude  $^{19}\text{F}$  NMR spectroscopy under collidine/collidinium buffer conditions

## 7.2 Copper-mediated electrolysis

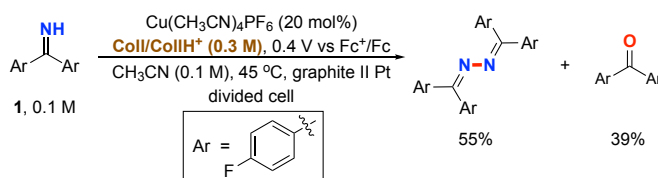

**Scheme S4.** Copper-mediated electrolysis under buffer conditions

Collidine/collidinium buffer: Reactions were carried out with a graphite rod anode (0.6 cm OD x 6 cm L, ~ 4 cm was immersed in the solution), a platinum wire cathode (1.0 cm, spiral wire) and a  $\text{Ag}/\text{Ag}^+$  reference electrode. In the anodic chamber, **1** (0.5 mmol),  $\text{Cu}(\text{CH}_3\text{CN})_4\text{PF}_6$  (0.1 mmol, 20 mol%), 2,4,6-collidine (3.0 mmol, 6 equiv.) and triflic acid (1.5 mmol, 3 equiv.) were added into  $\text{CH}_3\text{CN}$  (5.0 mL). In the cathodic chamber was placed 2,4,6-collidine (1.5 mmol, 0.3 M),

triflic acid (1.5 mmol, 0.3 M) and CH<sub>3</sub>CN (5.0 mL). The solution was purged with nitrogen for 10 min, after which the bulk electrolysis was performed under constant potential at 0.4 V vs Fc<sup>+</sup>/Fc under 45 °C. The reaction was allowed to run overnight (14 h). After that, the solution in both chambers were collected and analyzed by crude <sup>19</sup>F NMR spectroscopy with Fluorobenzene as internal standard.

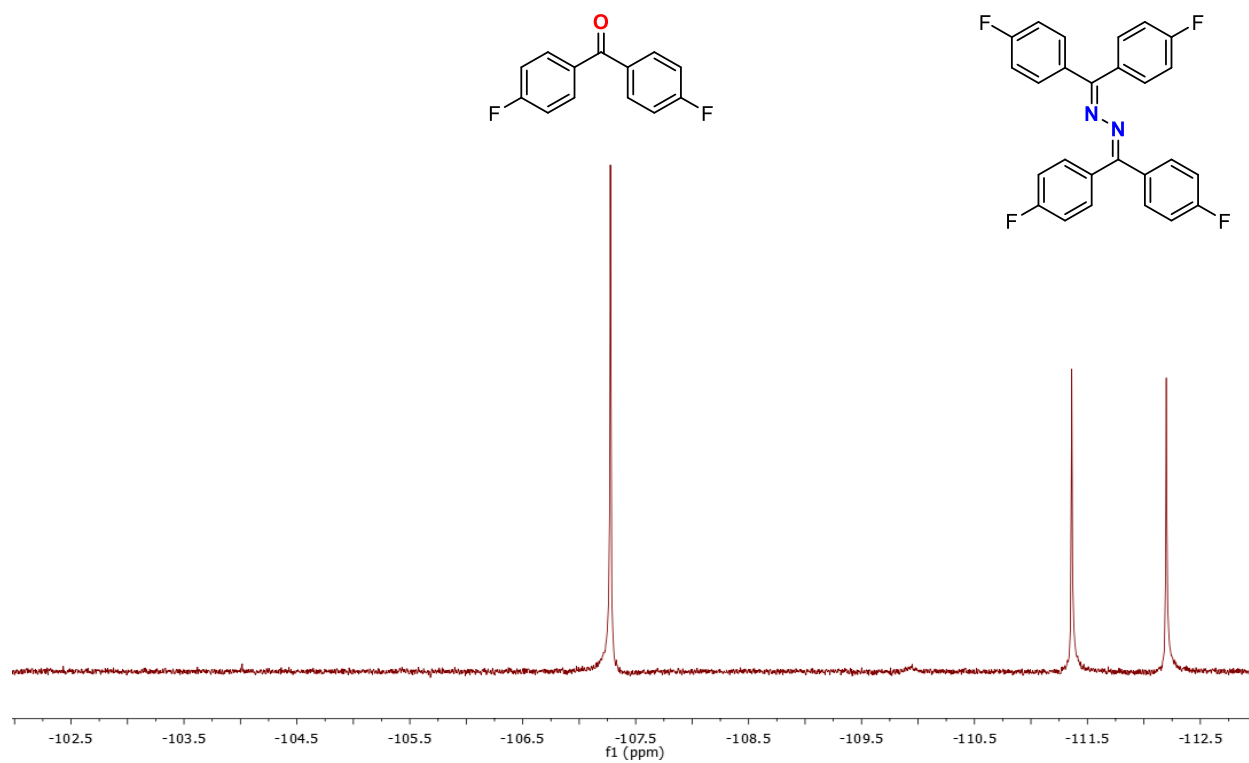

**Figure S16.** Crude <sup>19</sup>F NMR spectroscopy under collidine/collidinium buffer conditions

## 8. DFT calculations

All calculations employed density functional theory (DFT) using B3LYP functional in conjunction with 6-311+G(2d,p) basis set. Vibrational frequency calculations were performed to determine all structures are a minima on the potential energy surface and to determine the Gibbs Free energies at 298.15 K. All calculations used the Polarizable Continuum Model (PCM) to model a solvent. The solvent used is Acetonitrile. All calculations were performed using Gaussian 16.<sup>6</sup> All optimized structures, electronic and Gibbs free energies are reported below.

**Table S7.** DFT-Computed Energies.

| Molecule                                                                   | Electronic Energy<br>(Hartrees) | Gibbs Free Energy<br>(Hartrees) |
|----------------------------------------------------------------------------|---------------------------------|---------------------------------|
| NH <sub>3</sub>                                                            | -56.5892746483                  | -56.573158                      |
| N <sub>2</sub> H <sub>4</sub>                                              | -111.920594365                  | -111.88929                      |
| C <sub>13</sub> H <sub>9</sub> F <sub>2</sub> N ( <b>1</b> )               | -755.460027818                  | -755.314231                     |
| C <sub>26</sub> H <sub>16</sub> F <sub>4</sub> N <sub>2</sub> ( <b>2</b> ) | -1509.68510168                  | -1509.394308                    |

### NH<sub>3</sub>

|   |            |            |            |
|---|------------|------------|------------|
| N | -0.005034  | 0.00790441 | -0.0037053 |
| H | 0.00249263 | -0.0039142 | 1.01259596 |
| H | 0.9675813  | -0.0039139 | -0.2985686 |
| H | -0.4056339 | -0.8784588 | -0.2985689 |

### N<sub>2</sub>H<sub>4</sub>

|   |           |           |           |
|---|-----------|-----------|-----------|
| N | 0.000000  | 0.000000  | 0.000000  |
| N | 0.000000  | -1.443396 | 0.000000  |
| H | -0.951808 | -1.742782 | -0.182912 |
| H | 0.253397  | -1.809660 | 0.915374  |
| H | 0.951808  | 0.299386  | -0.182912 |
| H | -0.253397 | 0.366264  | 0.915374  |

### C<sub>13</sub>H<sub>9</sub>F<sub>2</sub>N

|   |            |            |            |
|---|------------|------------|------------|
| C | 2.68994467 | -1.1555816 | 0.89990479 |
| C | 3.71119473 | -0.7011175 | 0.08499314 |
| C | 3.56136382 | 0.37905347 | -0.7662554 |
| C | 2.33666803 | 1.03430926 | -0.7887588 |
| C | 1.27562478 | 0.60726342 | 0.01734229 |
| C | 1.46561314 | -0.5003753 | 0.85091042 |
| H | 0.65772392 | -0.8469647 | 1.48254143 |

|   |            |            |            |
|---|------------|------------|------------|
| C | -0.0122024 | 1.36597022 | 0.02434032 |
| C | -1.2940249 | 0.60642984 | -0.0030081 |
| C | -1.3968906 | -0.6293512 | -0.6507043 |
| C | -2.6105079 | -1.3045721 | -0.7156596 |
| C | -3.7123138 | -0.7318827 | -0.1082843 |
| C | -3.6533572 | 0.48449058 | 0.55136932 |
| C | -2.437647  | 1.15128587 | 0.59396854 |
| H | -2.3636104 | 2.1042209  | 1.10024914 |
| H | -4.5399781 | 0.89080316 | 1.02054315 |
| F | -4.8986229 | -1.3892537 | -0.1558979 |
| H | -2.7024614 | -2.254851  | -1.2249986 |
| H | -0.5288821 | -1.0672248 | -1.1257798 |
| N | -0.0625964 | 2.64593401 | 0.05551199 |
| H | 0.87528625 | 3.04588073 | 0.11130832 |
| H | 2.20146516 | 1.87660572 | -1.4562128 |
| H | 4.38270689 | 0.69255991 | -1.397208  |
| F | 4.90568693 | -1.3441193 | 0.11746112 |
| H | 2.85231782 | -2.0022946 | 1.55390558 |

**C<sub>26</sub>H<sub>16</sub>F<sub>4</sub>N<sub>2</sub>**

|   |            |            |            |
|---|------------|------------|------------|
| C | -5.3019437 | -0.3791872 | 0.3919993  |
| C | -5.4812199 | -1.3571919 | -0.5677894 |
| C | -4.4647874 | -1.7628601 | -1.4170687 |
| C | -3.220549  | -1.1640629 | -1.2898682 |
| C | -2.9921475 | -0.1652255 | -0.3320653 |
| C | -4.0511486 | 0.21801026 | 0.5000739  |
| H | -3.8993023 | 0.98043871 | 1.25251419 |
| C | -1.6478547 | 0.4473298  | -0.191716  |
| C | -1.5384826 | 1.84219954 | 0.31709849 |
| C | -2.3114707 | 2.85610495 | -0.2614294 |
| C | -2.2044801 | 4.17301165 | 0.16821713 |
| C | -1.3309593 | 4.45551714 | 1.20280083 |
| C | -0.5608991 | 3.48299317 | 1.81446133 |
| C | -0.6641408 | 2.17489167 | 1.35754338 |
| H | -0.0677928 | 1.40643614 | 1.82950655 |
| H | 0.10351111 | 3.746942   | 2.62683496 |
| F | -1.2286718 | 5.73743023 | 1.63794199 |
| H | -2.7871188 | 4.96481553 | -0.2841192 |
| H | -2.9958309 | 2.61971226 | -1.0663887 |
| N | -0.6420984 | -0.2900374 | -0.5301465 |

|   |            |            |            |
|---|------------|------------|------------|
| N | 0.59336925 | 0.31224338 | -0.5730293 |
| C | 1.62375534 | -0.4358701 | -0.3529692 |
| C | 1.55714585 | -1.8494701 | 0.10948955 |
| C | 2.27393782 | -2.8391806 | -0.5738402 |
| C | 2.20285992 | -4.17182   | -0.1874547 |
| C | 1.42379743 | -4.4952342 | 0.9087495  |
| C | 0.71278618 | -3.5482022 | 1.62319907 |
| C | 0.77770219 | -2.2232968 | 1.20963767 |
| H | 0.22693547 | -1.4744937 | 1.76178017 |
| H | 0.12238351 | -3.8442493 | 2.4804243  |
| F | 1.35796539 | -5.7932707 | 1.30158574 |
| H | 2.74162387 | -4.9447458 | -0.7197542 |
| H | 2.88481325 | -2.5709111 | -1.426513  |
| C | 2.95152379 | 0.18387672 | -0.5873648 |
| C | 4.07902164 | -0.2294531 | 0.13288664 |
| C | 5.31647499 | 0.37354988 | -0.0617435 |
| C | 5.41228213 | 1.3882161  | -0.9950857 |
| C | 4.32572958 | 1.82469843 | -1.7352586 |
| C | 3.09647715 | 1.21936244 | -1.5222343 |
| H | 2.23404941 | 1.54293059 | -2.088869  |
| H | 4.44812839 | 2.61629964 | -2.4631208 |
| F | 6.61800942 | 1.97795413 | -1.1983499 |
| H | 6.18921882 | 0.06587491 | 0.49920512 |
| H | 3.99268403 | -1.0206265 | 0.86576267 |
| H | -2.4118897 | -1.4639882 | -1.942298  |
| H | -4.6521363 | -2.52596   | -2.1613648 |
| F | -6.7011699 | -1.9407576 | -0.6867737 |
| H | -6.1213935 | -0.094936  | 1.03907689 |

## 9. Assessment of Overpotential with a Ruthenium Polypyridyl Complex

The approach to the thermodynamics of  $N_2/NH_3$  in THF is adapted from Miller et al. for the interconversion of  $N_2$ ,  $NH_3$ ,  $N_2H_4$  and  $N_2H_2$  in acetonitrile.<sup>7</sup> The method employs buffered electrolytes to ensure a stable thermodynamic reference point, and the  $H^+/H_2$  open-circuit potential (OCP)<sup>8</sup> was measured under the non-aqueous reaction conditions to enable conversion of aqueous to non-aqueous thermodynamic data. It has been reported that the saturated concentration of ammonia in THF is 0.34 M,<sup>9</sup> and the  $\Delta G^\circ$  of  $NH_3(g)/NH_3(THF)$  is calculated to be 0.64 kcal/mol (Scheme S5, eq i). The  $H^+/H_2$  open-circuit potential (OCP) was measured to be -0.86 V vs  $Fc^+/Fc$  under conditions of  $NH_4PF_6$  (0.2 M, 326 mg), saturated ammonia in THF (10 mL) and 1 atm of hydrogen atmosphere (via bubbling hydrogen gas into the solution). The arithmetic yields the thermodynamic potential of ammonia oxidation to dinitrogen, which is -0.81 V vs  $Fc^+/Fc$ .

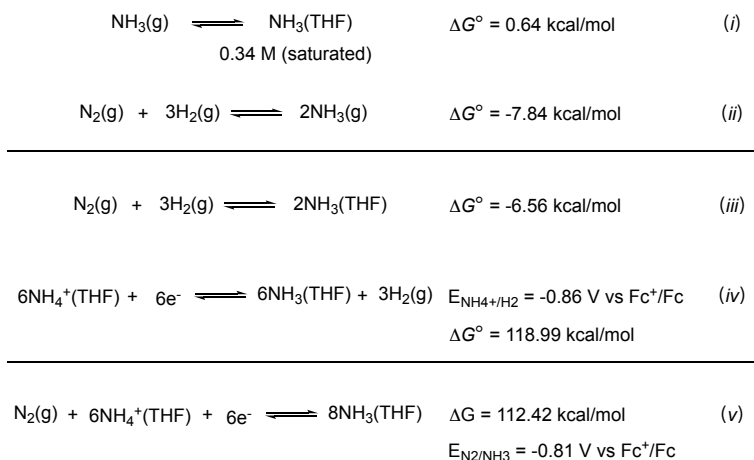

**Scheme S5.** Thermodynamic determination of  $N_2/NH_3$  couple in THF.

## 10. Compounds Characterization

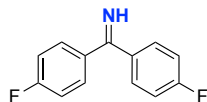

This compound is synthesized following a reported procedure for benzophenoneimine synthesis.<sup>10</sup> In a 3-neck flask, 150 ml of dry toluene was chilled in an ice-bath under nitrogen. A portion of 4,4'-difluorobenzophenone (20 mmol, 4.36 g) was added and allowed to dissolve. At this point, 22 ml of  $\text{TiCl}_4$  (1.0 M in toluene) was added slowly, leading to a yellow precipitate. The nitrogen purge of the flask was halted, and gaseous  $\text{NH}_3$  was introduced to the solution by a gas dispersion tube until saturation. The suspension became green and stirred overnight. Then, 250 ml of saturated aqueous sodium carbonate was added and stirred for 10 min. The layers were separated, and the organic layer was extracted with 75 ml saturated sodium carbonate and then 75 ml of brine. The first aqueous phase was extracted with two 100 ml portions of ethyl acetate, which were in turn extracted with 75 ml of brine. The combined organic solutions were dried over sodium sulfate, filtered and concentrated by rotary evaporation to give the titled product as light yellow oil (3.57 g, 82% yield). The product is used without purification. The spectral data are available in the literature.<sup>11</sup>

$^1\text{H}$  NMR (400 MHz,  $\text{CDCl}_3$ )  $\delta$  9.67 (s, 1H), 7.55 (s, 4H), 7.09 (t,  $J = 8.6$  Hz, 4H).  $^{13}\text{C}$  NMR (100 MHz,  $\text{CDCl}_3$ )  $\delta$  175.8, 163.9 (d,  $J = 250.7$  Hz), 135.2, 130.3, 115.3 (d,  $J = 21.7$  Hz).  $^{19}\text{F}$  NMR (377 MHz,  $\text{CDCl}_3$ )  $\delta$  -109.83 (s).

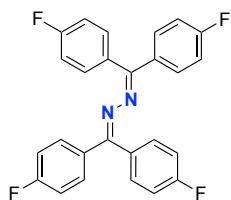

After bulk electrolysis of iodide-mediated system, the reaction solution was concentrated by rotary evaporation. The residue was purified via column chromatography on silica gel with hexane/ethyl acetate (5:1) as eluent to give the azine as yellow solid (87.6 mg, 81% isolated yield).

$^1\text{H}$  NMR (400 MHz,  $\text{CDCl}_3$ )  $\delta$  7.53 – 7.42 (m, 4H), 7.37 – 7.29 (m, 4H), 7.13 (t,  $J = 8.7$  Hz, 4H), 7.00 (t,  $J = 8.7$  Hz, 4H).  $^{13}\text{C}$  NMR (100 MHz,  $\text{CDCl}_3$ )  $\delta$  163.9 (d,  $J = 250.9$  Hz), 162.8 (d,  $J = 249.4$  Hz), 158.8, 134.0 (d,  $J = 3.1$  Hz), 131.4 (d,  $J = 8.2$  Hz), 131.1 (d,  $J = 3.5$  Hz), 130.6 (d,  $J = 8.5$  Hz), 115.2 (d,  $J = 21.7$  Hz), 115.1 (d,  $J = 21.6$  Hz).  $^{19}\text{F}$  NMR (377 MHz,  $\text{CDCl}_3$ )  $\delta$  -110.44 (s), -111.22 (s).

**HRMS (ESI)** Calculated for  $[\text{M}+\text{H}]^+$ : 433.1322, measured: 433.1318.

## 11. NMR Spectra

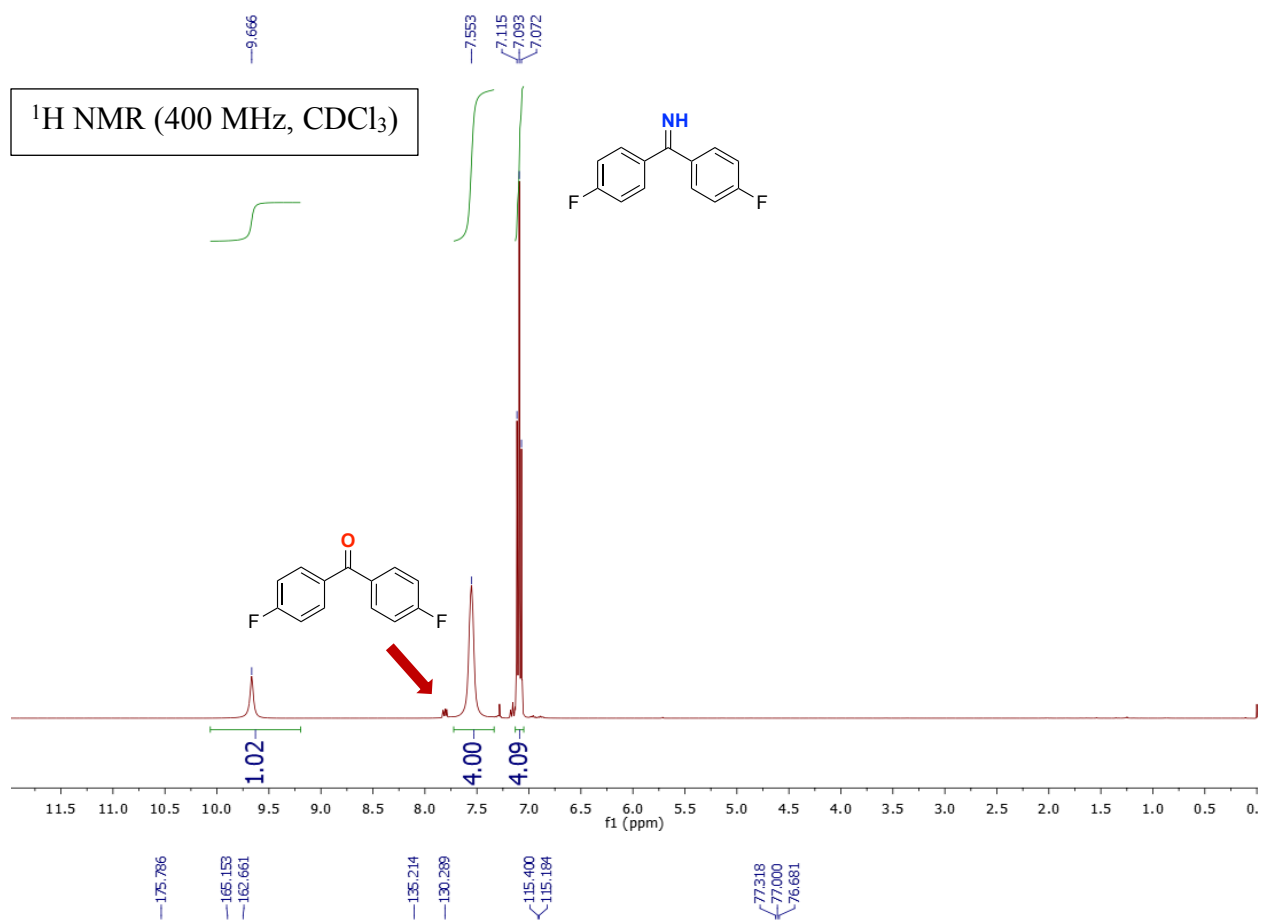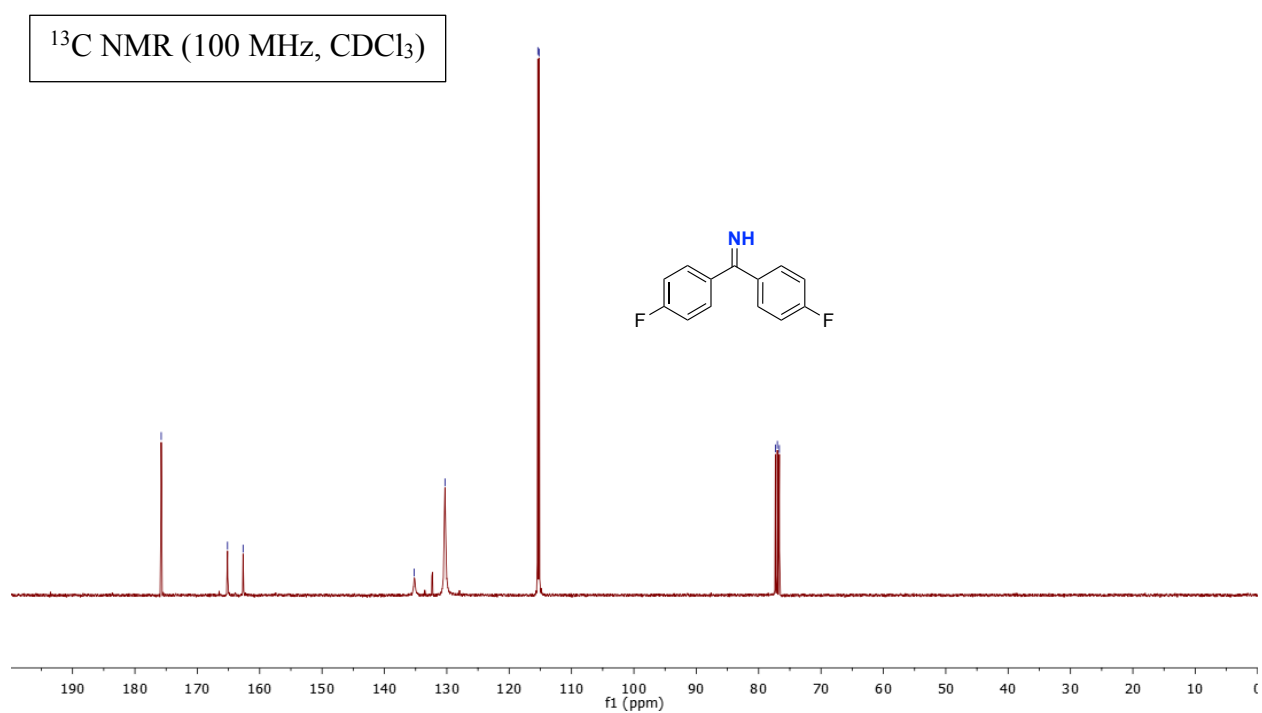

$^{19}\text{F}$  NMR (377 MHz,  $\text{CDCl}_3$ )

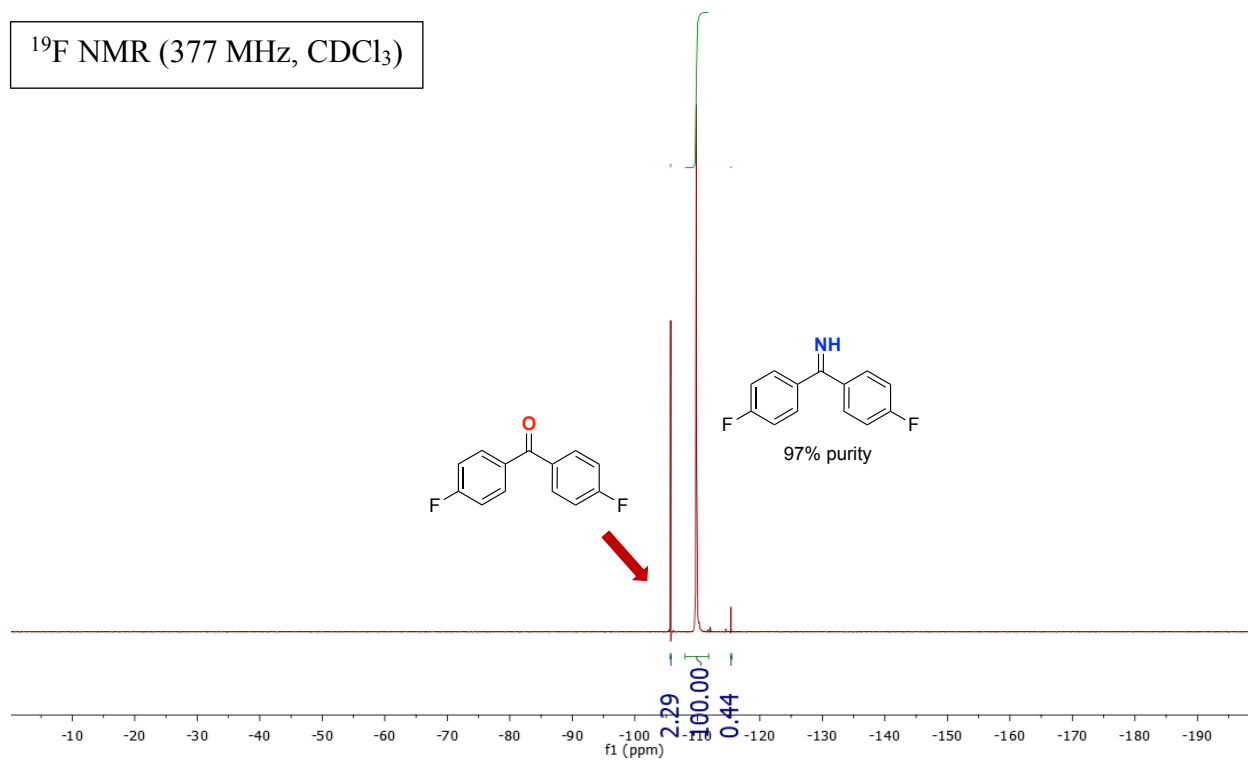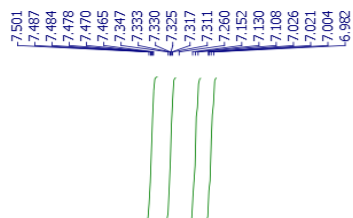

$^1\text{H}$  NMR (400 MHz,  $\text{CDCl}_3$ )

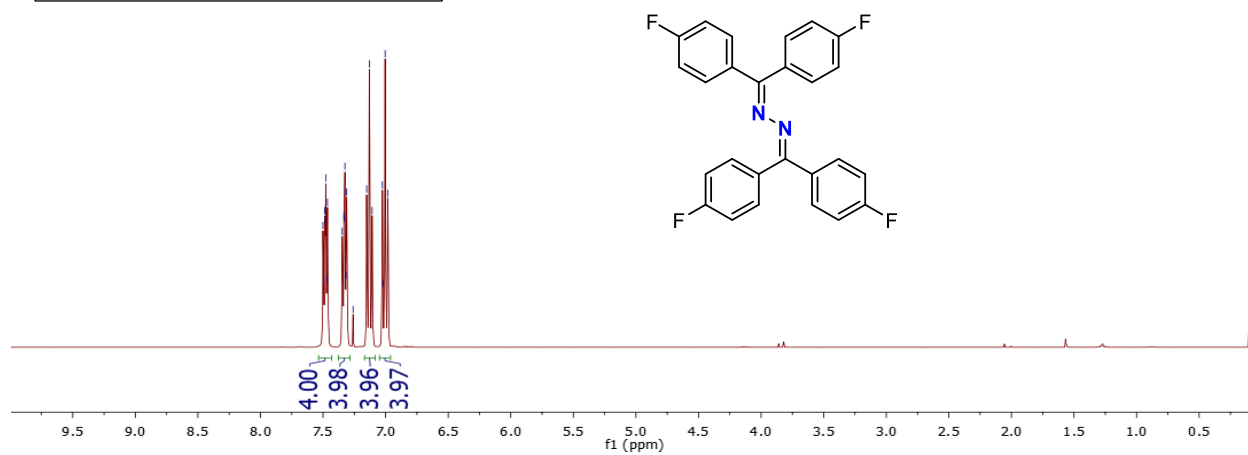

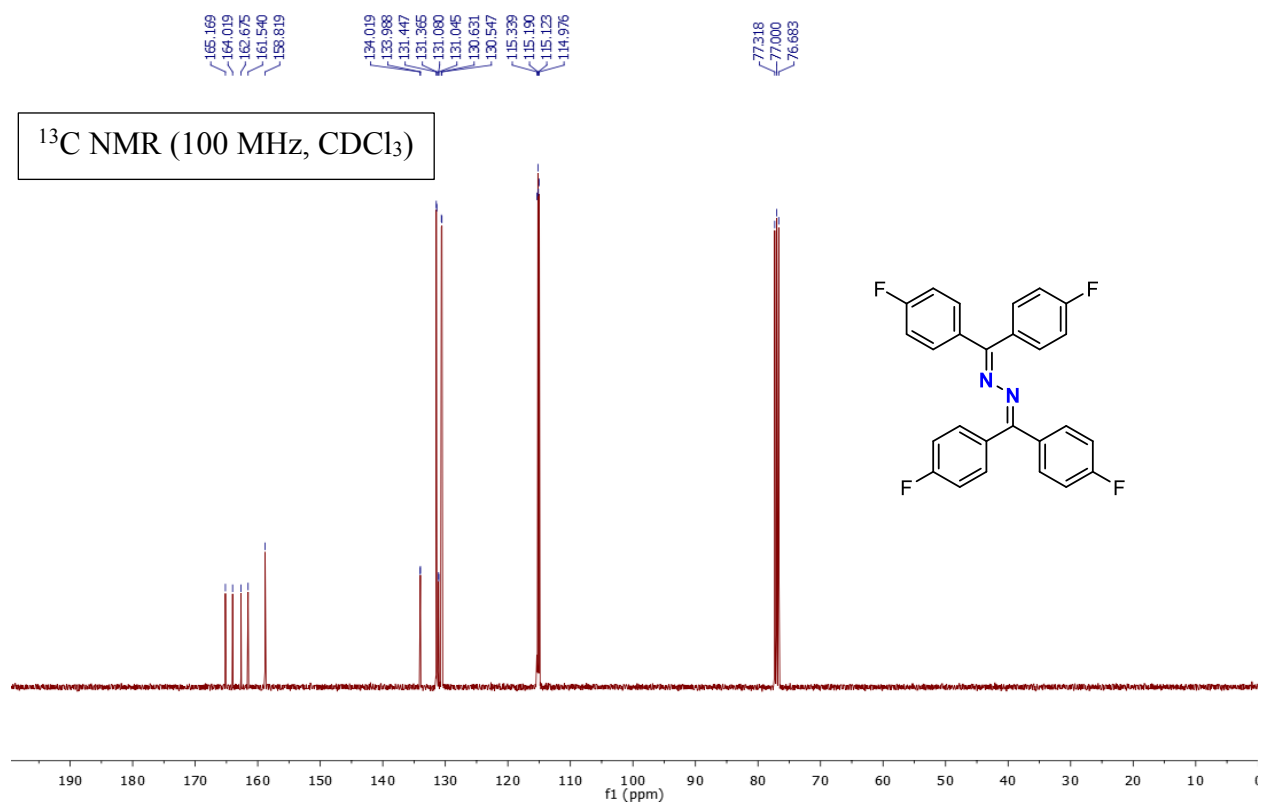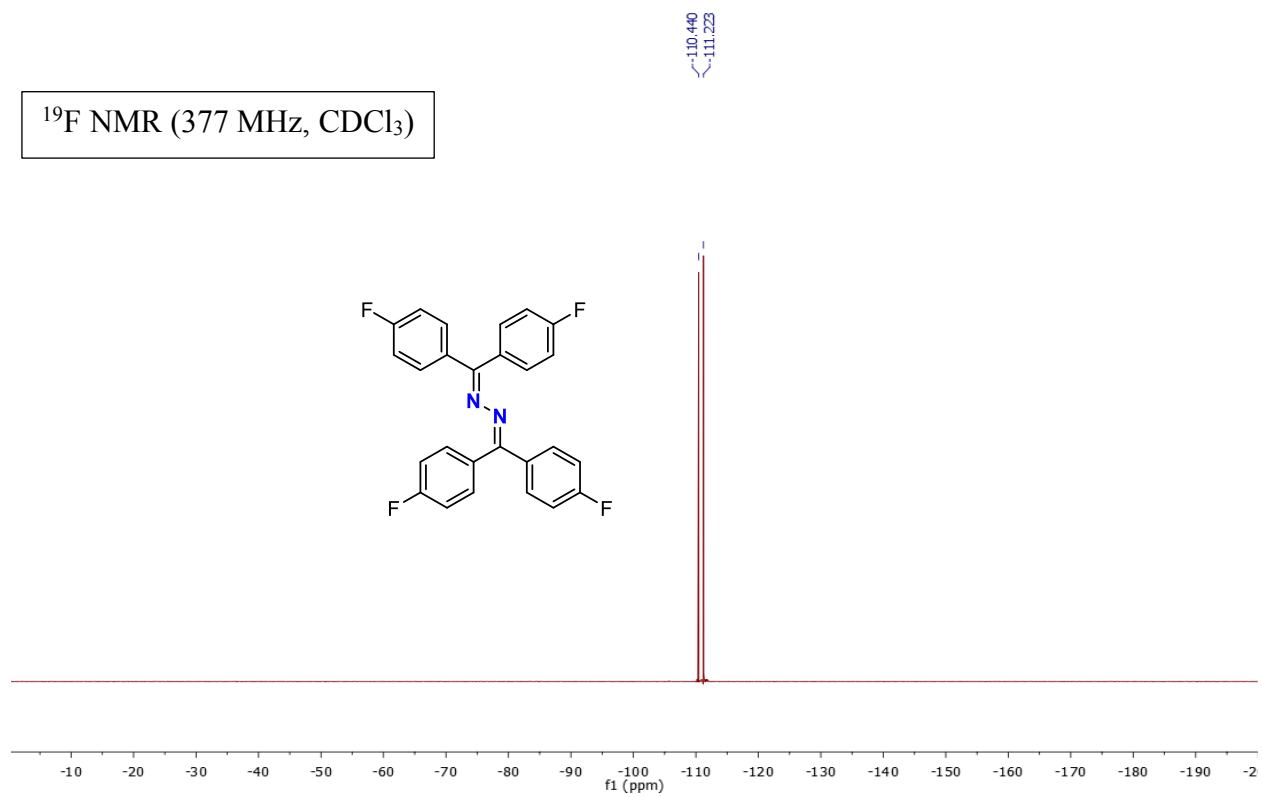

## 12. References

1. Nervi, C. [http://lem.ch.unito.it/chemistry/esp\\_manual.html](http://lem.ch.unito.it/chemistry/esp_manual.html) (accessed 6/3/2020).
2. Lindley, B. M.; Appel, A. M.; Krogh-Jespersen, K.; Mayer, J. M.; Miller, A. J. M. Evaluating the thermodynamics of electrocatalytic N<sub>2</sub> reduction in acetonitrile. *ACS Energy Lett.* **2016**, *1*, 698-704.
3. Choi, P. J.; Petterson, K. A. Roberts, J. D. Ionization equilibria of dicarboxylic acids in dimethyl sulfoxide as studied by NMR. *J. Phys. Org. Chem.* **2002**, *15*, 278-286.
4. Kaljurand, I.; Kütt, A.; Sooväli, L.; Rodima, T.; Mäemets, V.; Leito, I.; Koppel, I. A. Extension of the self-consistent spectrophotometric basicity scale in acetonitrile to a full span of 28 pK<sub>a</sub> units: unification of different basicity scales. *J. Org. Chem.* **2005**, *70*, 1019-1028.
5. Eckert, F.; Leito, I.; Kaljurand, I.; Kütt, A.; Klamt, A.; Diedenhofen, M. Prediction of Acidity in Acetonitrile Solution with COSMO-RS. *J. Comput. Chem.* **2009**, *30*, 799-810.
6. *Gaussian 16* (Revision B.01), Frisch, M. J.; Trucks, G. W.; Schlegel, H. B.; Scuseria, G. E.; Robb, M. A.; Cheeseman, J. R.; Scalmani, G.; Barone, V.; Petersson, G. A.; Nakatsuji, H.; Li, X.; Caricato, M.; Marenich, A. V.; Bloino, J.; Janesko, B. G.; Gomperts, R.; Mennucci, B.; Hratchian, H. P.; Ortiz, J. V.; Izmaylov, A. F.; Sonnenberg, J. L.; Williams-Young, D.; Ding, F.; Lipparini, F.; Egidi, F.; Goings, J.; Peng, B.; Petrone, A.; Henderson, T.; Ranasinghe, D.; Zakrzewski, V. G.; Gao, J.; Rega, N.; Zheng, G.; Liang, W.; Hada, M.; Ehara, M.; Toyota, K.; Fukuda, R.; Hasegawa, J.; Ishida, M.; Nakajima, T.; Honda, Y.; Kitao, O.; Nakai, H.; Vreven, T.; Throssell, K.; Montgomery, Jr., J. A.; Peralta, J. E.; Ogliaro, F.; Bearpark, M. J.; Heyd, J. J.; Brothers, E. N.; Kudin, K. N.; Staroverov, V. N.; Keith, T. A.; Kobayashi, R.; Normand, J.; Raghavachari, K.; Rendell, A. P.; Burant, J. C.; Iyengar, S. S.; Tomasi, J.; Cossi, M.; Millam, J. M.; Klene, M.; Adamo, C.; Cammi, R.; Ochterski, J. W.; Martin, R. L.; Morokuma, K.; Farkas, O.; Foresman, J. B.; Fox, D. J. Gaussian, Inc., Wallingford CT, 2016.
7. Lindley, B. M.; Appel, A. M.; Krogh-Jespersen, K.; Mayer, J. M.; Miller, A. J. M. Evaluating the thermodynamics of electrocatalytic N<sub>2</sub> reduction in acetonitrile. *ACS Energy Lett.* **2016**, *1*, 698-704.
8. Roberts, J. A. S.; Bullock, R. M. Direct determination of equilibrium potentials for hydrogen oxidation/production by open circuit potential measurements in acetonitrile. *Inorg. Chem.* **2013**, *52*, 3823-3835.
9. Habibzadeh, F.; Miller, S. L.; Hamann, T. W.; Smith, III M. R. Homogeneous electrocatalytic oxidation of ammonia to N<sub>2</sub> under mild conditions. *Proc. Natl. Acad. Sci. U.S.A.* **2019**, *119*, 2849-2853.
10. Brenner, D. G.; Cavolowsky, K. M.; Shepard, K. L. Imino-bridged heterocycles. IV [1]. A facile synthesis of sulfenimines derived from diaryl ketones. *J. Heterocyclic Chem.* **1985**, *22*, 805-808.
11. He, R.; Huang, Z.-T.; Zheng, Q.-Y.; Wang, C. Manganese-catalyzed dehydrogenative [4+2] annulation of N-H imines and alkynes by C-H/N-H activation. *Angew. Chem. Int. Ed.* **2014**, *53*, 4950-4953.
